# Supplementary material for: Linking cohort-based data with electronic health records: a proof-of-concept methodological study in Hong Kong
Source: PubMed Central journal article supplement — BMJ Open. 2021 Jun 22;11(6):e045868. doi: 10.1136/bmjopen-2020-045868 (PMC8220454; doi:10.1136/bmjopen-2020-045868), 2021-06-22
Supplement: bmjopen-2020-045868.draft_revisions.pdf [file bmjopen-2020-045868.draft_revisions.pdf]

# BMJ Open

BMJ Open is committed to open peer review. As part of this commitment we make the peer review history of every article we publish publicly available.

When an article is published we post the peer reviewers' comments and the authors' responses online. We also post the versions of the paper that were used during peer review. These are the versions that the peer review comments apply to.

The versions of the paper that follow are the versions that were submitted during the peer review process. They are not the versions of record or the final published versions. They should not be cited or distributed as the published version of this manuscript.

BMJ Open is an open access journal and the full, final, typeset and author-corrected version of record of the manuscript is available on our site with no access controls, subscription charges or pay-per-view fees (<http://bmjopen.bmj.com>).

If you have any questions on BMJ Open's open peer review process please email [info.bmjopen@bmj.com](mailto:info.bmjopen@bmj.com)

# BMJ Open

## Linking cohort-based data with electronic health records: a proof-of-concept methodological study in Hong Kong

|                               |                                                                                                                                                                                                                                                                                                                                                                                                                                                                                                                                                                                                                                                                                                                                                                                                                                                                                                                                                                                                                                                                                                                                                                                                                                                                                                                                                                                                                                                                                                               |
|-------------------------------|---------------------------------------------------------------------------------------------------------------------------------------------------------------------------------------------------------------------------------------------------------------------------------------------------------------------------------------------------------------------------------------------------------------------------------------------------------------------------------------------------------------------------------------------------------------------------------------------------------------------------------------------------------------------------------------------------------------------------------------------------------------------------------------------------------------------------------------------------------------------------------------------------------------------------------------------------------------------------------------------------------------------------------------------------------------------------------------------------------------------------------------------------------------------------------------------------------------------------------------------------------------------------------------------------------------------------------------------------------------------------------------------------------------------------------------------------------------------------------------------------------------|
| Journal:                      | <i>BMJ Open</i>                                                                                                                                                                                                                                                                                                                                                                                                                                                                                                                                                                                                                                                                                                                                                                                                                                                                                                                                                                                                                                                                                                                                                                                                                                                                                                                                                                                                                                                                                               |
| Manuscript ID                 | bmjopen-2020-045868                                                                                                                                                                                                                                                                                                                                                                                                                                                                                                                                                                                                                                                                                                                                                                                                                                                                                                                                                                                                                                                                                                                                                                                                                                                                                                                                                                                                                                                                                           |
| Article Type:                 | Original research                                                                                                                                                                                                                                                                                                                                                                                                                                                                                                                                                                                                                                                                                                                                                                                                                                                                                                                                                                                                                                                                                                                                                                                                                                                                                                                                                                                                                                                                                             |
| Date Submitted by the Author: | 14-Oct-2020                                                                                                                                                                                                                                                                                                                                                                                                                                                                                                                                                                                                                                                                                                                                                                                                                                                                                                                                                                                                                                                                                                                                                                                                                                                                                                                                                                                                                                                                                                   |
| Complete List of Authors:     | GAO, Le; University of Hong Kong, Department of Pharmacology and Pharmacy<br>Leung, Miriam T Y; University of Hong Kong, Department of Pharmacology and Pharmacy<br>Li, Xue; University of Hong Kong, Department of Medicine; University of Hong Kong, Department of Pharmacology and Pharmacy<br>Chui, Celine; University of Hong Kong, Department of Pharmacology and Pharmacy; University of Hong Kong, Department of Social Work and Social Administration<br>Wong, Rosa Sze Man; University of Hong Kong, 4Department of Paediatrics and Adolescent Medicine<br>Au Yeung, Shiu Lun; University of Hong Kong, School of Public Health<br>Chan, Edward; University of Hong Kong<br>Chan, Adrienne; University of Hong Kong, Department of Pharmacology and Pharmacy<br>Chan, Esther; University of Hong Kong, Department of Pharmacology and Pharmacy<br>Wong, HSW; University of Hong Kong, Department of Paediatrics & Adolescent Medicine<br>Lee, Tatia; University of Hong Kong, Department of Psychology<br>Rao, Nirmala; University of Hong Kong, Faculty of Education<br>Wing, Yun-Kwok; The Chinese University of Hong Kong, Psychiatry<br>Lum, Terry; University of Hong Kong, Department of Social Work and Social Administration<br>Leung, Gabriel; University of Hong Kong, School of Public Health<br>Ip, Patrick; University of Hong Kong, Department of Paediatrics and Adolescent Medicine<br>Wong, Ian C. K.; University of Hong Kong, Pharmacology and Pharmacy; UCL, School of Pharmacy |
| Keywords:                     | STATISTICS & RESEARCH METHODS, PAEDIATRICS, EPIDEMIOLOGY, PUBLIC HEALTH                                                                                                                                                                                                                                                                                                                                                                                                                                                                                                                                                                                                                                                                                                                                                                                                                                                                                                                                                                                                                                                                                                                                                                                                                                                                                                                                                                                                                                       |
|                               |                                                                                                                                                                                                                                                                                                                                                                                                                                                                                                                                                                                                                                                                                                                                                                                                                                                                                                                                                                                                                                                                                                                                                                                                                                                                                                                                                                                                                                                                                                               |

SCHOLARONE™  
Manuscripts

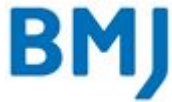

I, the Submitting Author has the right to grant and does grant on behalf of all authors of the Work (as defined in the below author licence), an exclusive licence and/or a non-exclusive licence for contributions from authors who are: i) UK Crown employees; ii) where BMJ has agreed a CC-BY licence shall apply, and/or iii) in accordance with the terms applicable for US Federal Government officers or employees acting as part of their official duties; on a worldwide, perpetual, irrevocable, royalty-free basis to BMJ Publishing Group Ltd ("BMJ") its licensees and where the relevant Journal is co-owned by BMJ to the co-owners of the Journal, to publish the Work in this journal and any other BMJ products and to exploit all rights, as set out in our [licence](#).

The Submitting Author accepts and understands that any supply made under these terms is made by BMJ to the Submitting Author unless you are acting as an employee on behalf of your employer or a postgraduate student of an affiliated institution which is paying any applicable article publishing charge ("APC") for Open Access articles. Where the Submitting Author wishes to make the Work available on an Open Access basis (and intends to pay the relevant APC), the terms of reuse of such Open Access shall be governed by a Creative Commons licence – details of these licences and which [Creative Commons](#) licence will apply to this Work are set out in our licence referred to above.

Other than as permitted in any relevant BMJ Author's Self Archiving Policies, I confirm this Work has not been accepted for publication elsewhere, is not being considered for publication elsewhere and does not duplicate material already published. I confirm all authors consent to publication of this Work and authorise the granting of this licence.

1  
2  
3 **Linking cohort-based data with electronic health records: a proof-of-concept**  
4  
5 **methodological study in Hong Kong**  
6  
7

8 Le Gao<sup>1</sup>, Miriam TY Leung<sup>1</sup>, Xue Li<sup>1,2</sup>, Celine SL Chui<sup>1,3,4</sup>, Rosa S Wong<sup>4</sup>, Shiu Lun Au  
9  
10 Yeung<sup>5</sup>, Edward WW Chan<sup>1</sup>, Adrienne YL Chan<sup>1</sup>, Esther W Chan<sup>1</sup>, Wilfred HS Wong<sup>4</sup>, Tatia  
11  
12 MC Lee<sup>6</sup>, Nirmala Rao<sup>7</sup>, YK Wing<sup>8</sup>, Terry YS Lum<sup>3</sup>, Gabriel M Leung<sup>5</sup>, Patrick Ip<sup>4</sup>, Ian CK  
13  
14 Wong<sup>1,9+</sup>  
15  
16

17  
18 <sup>1</sup>Centre for Safe Medication Practice and Research, Department of Pharmacology and Pharmacy,  
19 Li Ka Shing Faculty of Medicine, the University of Hong Kong, Hong Kong  
20

21 <sup>2</sup>Department of Medicine, Li Ka Shing Faculty of Medicine, the University of Hong Kong, Hong  
22 Kong  
23

24 <sup>3</sup>Department of Social Work and Social Administration, Faculty of Social Science, the  
25 University of Hong Kong, Hong Kong  
26

27 <sup>4</sup>Department of Paediatrics and Adolescent Medicine, Li Ka Shing Faculty of Medicine, the  
28 University of Hong Kong, Hong Kong  
29

30 <sup>5</sup>School of Public Health, Li Ka Shing Faculty of Medicine, the University of Hong Kong, Hong  
31 Kong  
32

33 <sup>6</sup>Department of Psychology, the University of Hong Kong, Hong Kong  
34

35 <sup>7</sup>Faculty of Education, the University of Hong Kong, Hong Kong  
36

37 <sup>8</sup>Department of Psychiatry, the Chinese University of Hong Kong, Hong Kong  
38

39 <sup>9</sup>Research Department of Practice and Policy, UCL School of Pharmacy, London, United  
40 Kingdom  
41

42  
43 <sup>+</sup>Corresponding Author: Ian C K Wong, Department of Pharmacology and Pharmacy, 2/F  
44 Laboratory Block, 21 Sassoon Road, Li Ka Shing Faculty of Medicine, the University of Hong  
45 Kong, Email: [wongick@hku.hk](mailto:wongick@hku.hk), Tel: (852) 3917-9160, Fax: (852) 2817-0859.  
46  
47  
48  
49  
50  
51  
52  
53  
54  
55  
56  
57  
58  
59  
60

## Abstract

**Objectives** Data linkage of cohort-based data and electronic health records (EHRs) has been practiced in many countries, but in Hong Kong, there is still a lack of such research. To expand the use of multi-source data, we aim to identify a feasible way to link two cohorts with EHRs in Hong Kong.

**Method** Participants in the “Children of 1997” Birth Cohort and the Chinese Early Development Instrument (CEDI) Cohort, who had provided written consent and Hong Kong Identity Card number (HKID) for record-linkage research, were separated into several batches. The HKIDs of each batch was then uploaded to the Hong Kong Clinical Data Analysis and Reporting System (CDARS) to retrieve EHRs. Within the same batch, each participant has a unique combination of date of birth and sex. As no HKIDs can be returned upon request in CDARS, the unique combination of date of birth and sex will then be used for exact matching in each batch. Also, raw data collected at the establishment of the two cohorts was checked for the mismatched cases.

**Results** In total, 3,473 and 910 HKIDs in the Birth Cohort and CEDI cohort were separated into 44 and 5 batches respectively and then submitted to the CDARS, with 100% and 97% being valid HKIDs respectively. The crude match rates were 99.76% and 93.05% in the two cohorts, and the match rates were confirmed to be 100% and 99.75% following checking the original records in the cohort.

**Conclusions** Using the date of birth and sex as identification variables, we linked the cohort data and hospital-based EHRs with high match rates. This method and the generated database will provide fundamentals for future multi-disciplinary research using CDARS.

### Strengths and limitations of this study

- Our study links cohort data with a regionwide electronic healthcare database that covers more than 90% of inpatient and more than 80% outpatient services in Hong Kong.
- The use of date of birth and sex as identification variables for exact matching is easy and feasible, with high accuracy as it is not likely to be affected by recall bias.
- Privacy is well-protected in the process of data linkage with the separated data management.
- It is less efficient when linking data which needs to be split into too many batches.
- Inherent problems of the different data sources such as erroneous data entries in the cohort data and EHRs including only data from public settings can complicate the data linkage process and the use of linked data.

**Contribution** PI, and ICKW conceptualised and designed the study. LG, MTYL, EWWC, and AYLC were equally involved in data collection, management. RSW, PI, SLAY, and GML were responsible for quality control of accuracy and integrity of data. EWWC analysed the data, and LG crosschecked the analysis. All the authors interpreted the data. LG and MTYL drafted the initial manuscript; All the authors critically reviewed the manuscript for important intellectual content. All authors contributed to the final draft and finally approved it to be published. All authors agreed to be accountable for all aspects of the work for any issue related to the accuracy or integrity of any part of the work. The corresponding author attests that all listed authors meet authorship criteria and that no others meeting the criteria have been omitted.

**Funding** This study was supported by Hong Kong Research Grants Council Collaborative Research Fund (No. C7009-19GF).

**Competing interests statement** None declared.

1  
2  
3 **Patient and public involvement** Patients and/or the public were not involved in the design, or  
4  
5 conduct, or reporting, or dissemination plans of this research.  
6  
7

8 **Patient consent for publication** Not required.  
9

10 **Data availability statement** Data are available upon reasonable request. Data from the study can  
11  
12 be requested from the corresponding author.  
13  
14

15  
16 **Word count** 2734  
17  
18  
19  
20  
21  
22  
23  
24  
25  
26  
27  
28  
29  
30  
31  
32  
33  
34  
35  
36  
37  
38  
39  
40  
41  
42  
43  
44  
45  
46  
47  
48  
49  
50  
51  
52  
53  
54  
55  
56  
57  
58  
59  
60

For peer review only

## Introduction

In epidemiological studies, both cohort-based data and registry/hospital-based electronic health records (EHRs) are useful data sources, each of them has their own strengths and weaknesses. Cohort-based surveys usually focus on a specific topic of interest<sup>1</sup>, with information such as health examination, biological indicators, socioeconomic information, lifestyle information like income, education, exercise, diet, or other qualitative data from questionnaires or interviews. However, they usually have limited years of follow-up with suboptimal follow-up rate<sup>2</sup>; they are labor-intensive for data collection and management<sup>3</sup>, and may lack statistical power or suitable variables to address new research questions beyond the initial cohort establishment due to inadequate sample sizes. For clinical data management systems such as EHRs, they are real-time, recorded as part of daily clinical practice or population management, and usually cover a large population with diagnosis, prescription, laboratory test, and payment information etc that can facilitate the long-term follow-up cost-effectiveness<sup>4,5</sup>. However, EHRs rely on the information routinely collected in clinical settings. Some fundamental risk factors including social, behavioural and environmental factors, and patient-reported outcomes are not well documented in EHRs compared to other epidemiological studies like cohort studies<sup>4</sup>.

Considering the strengths and limitations of different data sources, the opportunity to link data from different data collection methods and settings would expand the potential to address research questions of a broader scope. With the development of interdisciplinary research and big-data analytics, there is a trend of using record-linkage technologies to utilize the data from different settings. It is also very important to assess the validity and practicability before the linkage to make sure that it is useful for researches<sup>6</sup>. In many countries including Australia<sup>7</sup>, the US<sup>8</sup>, Scotland<sup>9</sup>, New Zealand<sup>10</sup>, China<sup>11</sup> etc, data-linkage has been practiced in medical research



1  
2  
3 and social research. To the best of our knowledge, only one other similar data-linking study was  
4 conducted in Hong Kong. It linked data from the social service databases and EHRs by getting  
5 the direct linkage from the Hong Kong Hospital Authority (HA)<sup>12</sup>. As the data was owned by the  
6 Government and it was a one-off linkage, it is not possible to maintain the databases as longitudinal  
7 dataset to evaluate long-term outcomes of children. Therefore, in this study, we aim to identify a  
8 feasible way to link two previously established children cohorts data and EHRs, to provide  
9 methodological fundamentals for the life trajectory and long-term assessment of various health  
10 conditions in Hong Kong.  
11  
12  
13  
14  
15  
16  
17  
18  
19  
20  
21  
22  
23  
24

## 25 **Method**

### 26 **Data source**

27  
28 We performed the record linkage of two cohort studies with the Clinical Data Analysis and  
29 Reporting System (CDARS), an electronic database used by the public healthcare system in  
30 Hong Kong. The “Children of 1997” Birth Cohort,<sup>13</sup> established by the School of Public Health  
31 at the University of Hong Kong (HKU) and the Department of Health, is one of Asia's largest  
32 birth cohorts. The study successfully recruited over 8,300 babies born in 1997. Since 2007, direct  
33 contact with subjects has been re-established and postal surveys have been regularly conducted  
34 in the entire cohort. 3,618 subjects participated in the Biobank clinical follow-up study for  
35 assessing body composition and providing biospecimens for biobanking from 2013-2018 where  
36 they provided consent for record linkage for future health-related studies. Another cohort is the  
37 Chinese Early Development Instrument (CEDI) Cohort, which was established in 2011 by the  
38 Department of Paediatrics & Adolescent Medicine at HKU to study the impact of socioeconomic  
39  
40  
41  
42  
43  
44  
45  
46  
47  
48  
49  
50  
51  
52  
53  
54  
55  
56  
57  
58  
59  
60

1  
2  
3 disparity on child health and development. Stratified samples of K3 children from high-income  
4 and low-income districts were successfully recruited in 2011/12 (K3, 5-6 years, N=567). These  
5 children were followed up in 2014/15 (Grade 3, 8-9 years, N=519, N=832 with chain-referral)  
6 and 2018/19 (Grade 7, 12-13 years, ongoing, expected N=583 with chain referral), respectively  
7 with a retention of >80%<sup>14 15</sup>. Participants in the two cohorts were asked for informed written  
8 consent of using their Hong Kong Identity Card number (HKID) for record-linkage and  
9 longitudinal follow-up for clinical research from their parents/guardians, or from the participant  
10 who was 18 years or older, and each of them provided their HKID voluntarily<sup>15 16</sup>.

11  
12 CDARS is an electronic database that includes EHRs since 1995 from all public hospitals and  
13 clinics in Hong Kong. It contains de-identified inpatient, outpatient (ambulatory care), and  
14 emergency department admissions records to protect patient confidentiality. Information  
15 including diagnosis, hospital admissions and discharges, payment method, and prescription and  
16 dispensing information are recorded in CDARS. Data from CDARS has been validated and used  
17 in many previous epidemiological studies on children's neurodevelopment disorders<sup>17-20</sup>.

### 18 19 20 21 22 23 24 25 26 27 28 29 30 31 32 33 34 35 36 37 **Record-linkage**

38  
39 Individuals in the two cohorts who provided HKID were included. Firstly, we used the  
40 combination of date of birth and sex to generate reference ID in each cohort database; and then  
41 we separated all the participants into several batches and ensured, within the same batch, each  
42 participant has a unique reference ID (Figure 1). Secondly, we used the HKID in each batch to  
43 retrieve their patient ID, sex and date of birth from CDARS. At this step, the CDARS would  
44 return the number of valid HKIDs uploaded and identify invalid HKIDs if any (Equation 1). Due  
45 to the protection of patient privacy, only the patient ID but not the HKID can be returned upon  
46 request in CDARS. Thus for records with valid HKIDs, we used unique combinations of date of  
47  
48  
49  
50  
51  
52  
53  
54  
55  
56  
57  
58  
59  
60

1  
2  
3 birth and sex retrieved from CDARS (Equation 2) for further matching in each batch with the  
4 information from the cohort database (Equation 3) to shorten the matching time. For those  
5 mismatched cases, we checked the raw data collected for the two cohorts (questionnaires in  
6 paper format) to exclude the possibilities of data entry errors and ensure the highest match rate  
7 (Equation 4). To protect data security and patient privacy, we separated the management of  
8 cohort ID, HKID and patient ID. The data retrieval process and record-linkage flow were  
9 illustrated in Figure 2. EC had access to the cohort data including cohort ID (not HKID),  
10 generated the matching batches. ML, the only person who had access to both HKID and cohort  
11 ID, then uploaded HKID and retrieved patient ID from CDARS data by batches, but was not  
12 included in the data management and analysis. LG did the batch splitting independently for  
13 quality control as well as the remaining analysis.  
14  
15  
16  
17  
18  
19  
20  
21  
22  
23  
24  
25  
26  
27  
28

29 We calculated the rate of each step using the following equations in Figure 3:  
30  
31

### 32 **Reported outcomes**

33  
34

35 Demographic information from CDARS including age, sex, and all diagnosis information up to  
36 December 2019 (records from inpatient, outpatient, and emergency settings), especially  
37 neurodevelopment disorders was described for the final matched individuals. We used the  
38 International Classification of Diseases, Ninth Revision, Clinical Modification (ICD-9-CM) code  
39 to identify these diagnoses, ICD-9-CM code 314 for ADHD, 299.0 for autism, 296.2, 296.3,  
40 296.82, 300.4, 309.0, 309.1, 311 for depression, 297 to 298 for psychosis, 295 for schizophrenia,  
41 345 for epilepsy, 300, 293.84 for anxiety disorders, 303 to 304 for alcohol and substance use  
42 disorder, 301 for personality disorder, 278.0 for overweight and obesity and 250.01, 250.03,  
43 250.11, 250.13, 250.21, 250.23, 250.31, 250.33, 250.41, 250.43, 250.51, 250.53, 250.61, 250.63,  
44  
45  
46  
47  
48  
49  
50  
51  
52  
53  
54  
55  
56  
57  
58  
59  
60

1  
2  
3 250.71, 250.73, 250.81, 250.83, 250.91, 250.93 for type I diabetes mellitus. Microsoft Excel®  
4  
5 and R v3.6.1 were used for data manipulation and analysis.  
6  
7

## 8 **Ethics**

9

10  
11 The study protocols were approved by the Institutional Review Board of the University of Hong  
12  
13 Kong/ Hospital Authority Hong Kong West Cluster (Reference No. UW 13-056 for the CEDI  
14  
15 Cohort and Reference No UW13-367 and UW15-412 for “Children of 1997” Birth Cohort,  
16  
17 Reference No UW 19-517 for this project).  
18  
19  
20  
21  
22  
23

## 24 **Results**

25

26  
27 In total, at the time of analyses, there were 3,473 HKIDs within 44 batches in the Birth Cohort  
28  
29 submitted to the CDARS and all of these HKIDs are valid with successful data retrieval from the  
30  
31 system. Among these 3,473 children included in the Birth Cohort, 95.85% have at least one  
32  
33 attendance of the public hospitals and clinics up to the end of 2019, and were successfully  
34  
35 matched from cohort data to CDARS data. For the 910 children separated in 5 batches in the  
36  
37 CEDI cohort, 889 of them provided valid HKID, and 820 of them have records in CDARS. The  
38  
39 crude match rate was 93.05%, and the match rate was increased to 99.75% after checking the  
40  
41 raw data about the date of birth and sex records in the CEDI Cohort. The rate of each match step  
42  
43 is shown in Table 1.  
44  
45  
46  
47  
48  
49  
50  
51  
52  
53  
54  
55  
56  
57  
58  
59  
60

**Table 1** Data-linkage rate in each step

|                                     | <b>“Children of 1997”<br/>Birth Cohort</b> | <b>CEDI Cohort</b> |
|-------------------------------------|--------------------------------------------|--------------------|
| <b>Submitted N</b>                  | 3473                                       | 910                |
| <b>Valid N (%)</b>                  | 3473 (100)                                 | 889 (97.69)        |
| <b>Retrieved N (%)</b>              | 3329 (95.85)                               | 820 (92.24)        |
| <b>Crude match N (%)</b>            | 3321 (99.76)                               | 763 (93.05)        |
| <b>Matched after checking N (%)</b> | 3329 (100)                                 | 818 (99.75)        |
| <b>Total link rate (%)</b>          | 95.85                                      | 89.89              |

**Table 2** Baseline information of the two cohorts

|                                                                     | “Children of 1997” Birth Cohort |                           |                           | CEDI Cohort               |                           |                           |
|---------------------------------------------------------------------|---------------------------------|---------------------------|---------------------------|---------------------------|---------------------------|---------------------------|
|                                                                     | Total                           | Female                    | Male                      | Total                     | Female                    | Male                      |
| <b>No. of final matched (%)</b>                                     | 3329 (100)                      | 1617 (48.57)              | 1712 (51.43)              | 818 (100)                 | 366 (44.74)               | 452 (55.26)               |
| <b>Median age at 31<sup>st</sup> Dec 2019 (IQR)</b>                 | 22.67<br>(22.63 to 22.71)       | 22.67<br>(22.63 to 22.71) | 22.67<br>(22.63 to 22.71) | 13.62<br>(13.30 to 13.96) | 13.64<br>(13.28 to 14.07) | 13.62<br>(13.30 to 13.93) |
| <b>No. of patients with psychiatric disorders (%)*</b>              |                                 |                           |                           |                           |                           |                           |
| ADHD                                                                | 47 (1.41)                       | 7 (0.43)                  | 40 (2.34)                 | 54 (6.60)                 | 14 (3.83)                 | 40 (8.85)                 |
| Autism                                                              | 11 (0.33)                       | 1 (0.06)                  | 10 (0.58)                 | 9 (1.10)                  | 0 (0.00)                  | 9 (1.99)                  |
| Depression                                                          | 7 (0.21)                        | 3 (0.19)                  | 4 (0.23)                  | 0 (0.00)                  | 0 (0.00)                  | 0 (0.00)                  |
| Psychosis                                                           | 1 (0.03)                        | 0 (0.00)                  | 1 (0.06)                  | 1 (0.12)                  | 0 (0.00)                  | 1 (0.22)                  |
| Schizophrenia                                                       | 0 (0.00)                        | 0 (0.00)                  | 0 (0.00)                  | 0 (0.00)                  | 0 (0.00)                  | 0 (0.00)                  |
| Epilepsy                                                            | 20 (0.60)                       | 12 (0.74)                 | 8 (0.47)                  | 2 (0.24)                  | 2 (0.55)                  | 0 (0.00)                  |
| Anxiety disorder                                                    | 7 (0.21)                        | 3 (0.19)                  | 4 (0.23)                  | 3 (0.37)                  | 2 (0.55)                  | 1 (0.22)                  |
| <b>No. of patients with alcohol and substance use disorder (%)*</b> | 1 (0.03)                        | 1 (0.06)                  | 0 (0.00)                  | 0 (0.00)                  | 0 (0.00)                  | 0 (0.00)                  |
| <b>No. of patients with personality disorder (%)*</b>               | 2 (0.06)                        | 1 (0.06)                  | 1 (0.06)                  | 1 (0.12)                  | 0 (0.00)                  | 1 (0.22)                  |
| <b>No. of patients with overweight and obesity (%)*</b>             | 23 (0.69)                       | 8 (0.49)                  | 15 (0.88)                 | 10 (1.22)                 | 0 (0.00)                  | 10 (2.21)                 |
| <b>No. of patients with type 1 diabetes (%)*</b>                    | 1 (0.03)                        | 0 (0.00)                  | 1 (0.06)                  | 0 (0.00)                  | 0 (0.00)                  | 0 (0.00)                  |

Abbreviation: IQR, interquartile range; ADHD, attention deficit hyperactivity disorder. \* summarised the events happened on or before one's 14<sup>th</sup> birthday.

1  
2  
3 After the data linkage, we summarised the baseline information using data from CDARS. In  
4 the Birth Cohort, 1617 individuals (48.75%) of final matched were female, and the  
5 percentage was 44.74% in the CEDI cohort. The median age of these finally matched  
6 individuals on 31<sup>st</sup> December 2019 was 22.67 in the Birth Cohort and 13.62 in the CEDI  
7 cohort. Considering the average age of those children in the CEDI cohort, we described the  
8 history of psychiatric disorders on or before 14 years old to make the information from these  
9 two cohorts more comparable. For psychiatric comorbidities diagnosed before 14 years old,  
10 ADHD (1.41%), epilepsy (0.60%), and autism (0.33%) were the top three frequent  
11 comorbidities. In the CEDI cohort, more children (6.60%) had the diagnosis of ADHD, but  
12 other psychiatry disorders were uncommon (Table 2).  
13  
14  
15  
16  
17  
18  
19  
20  
21  
22  
23  
24  
25  
26  
27  
28  
29

## 30 Discussion

31  
32 In recent years, with the increasing use of electronic mobile devices, investigation and  
33 follow-up in cohort studies have become easier to implement, so a large number of cohort  
34 studies were set up and related networks were formed to collaborate, such as the EU Joint  
35 Programme – Neurodegenerative Disease Research (JPND)<sup>21 22</sup>, Collaborative Initiative for  
36 Paediatric HIV Education and Research (CIPHER) Global Cohort Collaboration<sup>23 24</sup> and  
37 Biosocial Birth Cohort Research (BBCR) Network<sup>25</sup>. Meanwhile, many big data networks  
38 integrate EHRs for research, for example, the Neurological and mental health Global  
39 Epidemiology Network (NeuroGEN)<sup>26 27</sup> and the Asian Pharmacoepidemiology Network  
40 (AsPEN)<sup>28 29</sup>. These two kinds of data are both valuable for epidemiological research on  
41 different topics, with great potential to be used in policy research and social research too.  
42 Cohort studies can obtain more detailed and customised variables while EHRs can provide  
43 more data that are less subjected to attrition or response bias<sup>30</sup>. Therefore, making full use of  
44  
45  
46  
47  
48  
49  
50  
51  
52  
53  
54  
55  
56  
57  
58  
59  
60

1  
2  
3 these two kinds of data will provide a larger research scope. There are already good practices  
4  
5 for linking cohort studies to EHRs in other countries, for example the UK Biobank has been  
6  
7 linked to different kinds of EHRs<sup>31</sup>. However, there is still a lack of studies that utilize both  
8  
9 cohort studies and EHRs in Hong Kong and examine the feasibility and implications of the  
10  
11 linkage.  
12  
13

14  
15 In this study, we used the date of birth and sex to identify and match the individuals' data  
16  
17 across different data sources. The matching rate after checking the original cohort data was  
18  
19 100% for the "Children of 1997" Birth Cohort and 99.75% for the CEDI Cohort. The total  
20  
21 link rates of the two cohorts of 95.85% and 89.89% were lower than the matched rates after  
22  
23 checking, mainly because we included those without public hospital visits as well as those  
24  
25 who provide invalid HKID in the denominator for calculation. Our link rates were  
26  
27 comparable with a similar data linkage study in the United Kingdom<sup>32</sup>, where out of the 90%  
28  
29 who gave consent for data linkage, 99% of the Millennium Cohort were linked with birth  
30  
31 registration data and 83% linked with hospital record data.  
32  
33  
34

35  
36 Although we do not have the direct way to link the data of each individual by using their  
37  
38 HKID collected from the cohort, the use of date of birth and sex to do exact matching is an  
39  
40 easy and feasible way to avoid some potentially complex approval process. Also, the  
41  
42 identification variables for the exact matching, date of birth and sex, are fixed demographics,  
43  
44 which are easy to collect in various types of studies and not subjected to recall bias, so the  
45  
46 accuracy of these factors is relatively high. Another advantage of this study is that we can use  
47  
48 HKIDs which were collected from cohorts to retrieve data from CDARS and then do exact  
49  
50 matching by using the date of birth and sex to maintain patient privacy. The use of HKID  
51  
52 allows us to obtain data from CDARS, but at the same time, CDARS will not return data with  
53  
54 HKID, which makes the privacy of non-consented patients well-protected. Also, in our study,  
55  
56  
57  
58  
59  
60



1  
2  
3 HKID and other cohort information were stored in separate files and kept by different  
4  
5 researchers, which further strengthened the protection of privacy.  
6  
7

8  
9 The first limitation of this study is that we need to split all individuals into several batches so  
10  
11 that the individuals in each group have a unique combination of date of birth and sex, in  
12  
13 particular there were 44 batches in the “Children of 1997” Birth Cohort. Therefore, this  
14  
15 method is less efficient when linking data with large sample sizes, for example millions of  
16  
17 individuals, especially in cohorts with relatively concentrated dates of birth because it is time-  
18  
19 consuming to split the data into thousands of batches, and then upload them by batch and  
20  
21 load the data from CDARS. However, for a general cohort study, the sample size may not be  
22  
23 so large and the dates of birth not too concentrated, so this method is applicable to link cohort  
24  
25 studies and EHRs in Hong Kong. One of the obstacles identified in our study was erroneous  
26  
27 data entries that arose from the transcription of written responses of the paper questionnaire  
28  
29 to the electronic database. We overcome the obstacle by manually checking the physical  
30  
31 copies of the questionnaires, which is labor-intensive and less practical for large cohort  
32  
33 studies. Such error can be reduced by using electronic questionnaires to collect responses in  
34  
35 future cohort studies, thus eliminating transcribing error. Another issue is that the CDARS  
36  
37 data is collected by the HA from public hospitals, so that only individuals who had used  
38  
39 service from public hospitals can be linked. Only around 5% of our cohort with valid HKIDs  
40  
41 had not utilized public hospitals and were not linked. Similarly, the lower than expected  
42  
43 prevalence of the diseases reported may be due to the inclusion of people who do not  
44  
45 frequently go to public hospitals, leading to underestimation of the prevalence. In future  
46  
47 studies on the disease epidemiology, we can consider using the number of individuals who  
48  
49 frequently visit the public hospital as the denominator to eliminate such bias.  
50  
51  
52  
53  
54  
55

56  
57 We linked two cohorts with the EHRs and finally got almost all subjects matched  
58  
59 (both >99%), and the resultant longitudinal databases will allow researchers in Hong Kong to  
60

1  
2  
3 conduct long-term study on neurodevelopment disorders such as ADHD and Autism  
4  
5 Spectrum Disorder. Although many countries have developed longitudinal cohorts (databases  
6  
7 or registries) to systematically collect data on patients with ADHD<sup>33</sup>, Hong Kong lacks a  
8  
9 comparable cohort and an evidence-based policy to tackle the challenges of treating patients  
10  
11 with ADHD locally. Establishing an ADHD cohort with record linkage from multiple  
12  
13 datasets is essential to investigate the long-term impact of ADHD and inform policymakers  
14  
15 on effective management and support of patients through their life trajectory. Based on the  
16  
17 established children cohorts in Hong Kong developed by the research teams for various  
18  
19 proposes, this study developed a record linkage model to link project-based data and routine  
20  
21 clinical data and assess the impact of ADHD on health outcomes, education attainment, and  
22  
23 social service utilization. Data collected in these cohort studies are limited for the specific  
24  
25 purpose, and when linking them with EHRs, we are able to obtain more comprehensive  
26  
27 information for analysis. Take the CEDI as an example, the SWAN (Strength and Weakness  
28  
29 of ADHD-symptoms and Normal-behavior) questionnaire was used to identify the ADHD  
30  
31 symptoms, and socio-economic information was also available. After linking the cohort data  
32  
33 with hospital-based data, not only can we use the complementary data, such as the clinical  
34  
35 diagnosis, prescription and admission records which are not available in the cohort data as  
36  
37 well as the socio-economic information lacking in the hospital-based database, but can also  
38  
39 be ascertained for life-long follow-up.  
40  
41  
42  
43  
44  
45  
46

47 The linking method established in this study has been proven to be effective and to a large  
48  
49 extent ensure individual privacy. There are some limitations from cohort studies or medical  
50  
51 databases, but overall it provided a good basis for linking these types of data in the future to  
52  
53 expand the use of richer data resources and answer more research questions.  
54  
55  
56  
57  
58  
59  
60

## Conclusion

Using batches of HKID to get EHRs and then doing exact matching by date of birth and sex as identifiable variables, we demonstrated the feasibility of record-linkage between cohort-based data and hospital-based EHRs with high data linkage rates. The record linkage methodology and linked database generated from this study will provide fundamentals for future multi-disciplinary research.

## References

1. March S. Individual Data Linkage of Survey Data with Claims Data in Germany-An Overview Based on a Cohort Study. *Int J Environ Res Public Health* 2017;14(12) doi: 10.3390/ijerph14121543 [published Online First: 2017/12/14]
2. Funkhouser E, Vellala K, Baltuck C, et al. Survey Methods to Optimize Response Rate in the National Dental Practice-Based Research Network. *Eval Health Prof* 2017;40(3):332-58. doi: 10.1177/0163278715625738 [published Online First: 2016/01/13]
3. The use of epidemiological tools in conflict-affected populations: open-access educational resources for policy-makers [cited 2020 June 5 ]. Available from: [http://conflict.lshtm.ac.uk/page\\_51.htm](http://conflict.lshtm.ac.uk/page_51.htm) accessed June 5 2020.
4. Casey JA, Schwartz BS, Stewart WF, et al. Using Electronic Health Records for Population Health Research: A Review of Methods and Applications. *Annu Rev Public Health* 2016;37:61-81. doi: 10.1146/annurev-publhealth-032315-021353 [published Online First: 2015/12/17]
5. Abul-Husn NS, Kenny EE. Personalized Medicine and the Power of Electronic Health Records. *Cell* 2019;177(1):58-69. doi: 10.1016/j.cell.2019.02.039 [published Online First: 2019/03/23]
6. Rivera DR, Gokhale MN, Reynolds MW, et al. Linking electronic health data in pharmacoepidemiology: Appropriateness and feasibility. *Pharmacoepidemiol Drug Saf* 2020;29(1):18-29. doi: 10.1002/pds.4918 [published Online First: 2020/01/18]
7. McHugh L, Andrews RM, Leckning B, et al. Baseline incidence of adverse birth outcomes and infant influenza and pertussis hospitalisations prior to the introduction of influenza and pertussis vaccination in pregnancy: a data linkage study of 78 382 mother-infant pairs, Northern Territory, Australia, 1994-2015. *Epidemiol Infect* 2019;147:e233. doi: 10.1017/S0950268819001171 [published Online First: 2019/08/01]
8. Lohr AM, Ingram M, Carvajal SC, et al. Protocol for LINKS (linking individual needs to community and clinical services): a prospective matched observational study of a community health worker community clinical linkage intervention on the U.S.-Mexico border. *BMC Public Health* 2019;19(1):399. doi: 10.1186/s12889-019-6725-1 [published Online First: 2019/04/13]
9. Griffiths LJ, Cortina-Borja M, Tingay K, et al. Are active children and young people at increased risk of injuries resulting in hospital admission or accident and emergency department attendance? Analysis of linked cohort and electronic hospital records in Wales and Scotland.

- 1  
2  
3 *PLoS One* 2019;14(4):e0213435. doi: 10.1371/journal.pone.0213435 [published Online First:  
4 2019/04/11]
- 5  
6 10. Donovan GH, Michael YL, Gatzliolis D, et al. Association between exposure to the natural  
7 environment, rurality, and attention-deficit hyperactivity disorder in children in New  
8 Zealand: a linkage study. *Lancet Planet Health* 2019;3(5):e226-e34. doi: 10.1016/S2542-  
9 5196(19)30070-1 [published Online First: 2019/05/28]
- 10  
11 11. Yu HT, Yang Q, Sun XX, et al. Association of birth defects with the mode of assisted reproductive  
12 technology in a Chinese data-linkage cohort. *Fertil Steril* 2018;109(5):849-56. doi:  
13 10.1016/j.fertnstert.2018.01.012 [published Online First: 2018/05/21]
- 14  
15 12. Lo CK, Ho FK, Chan KL, et al. Linking Healthcare and Social Service Databases to Study the  
16 Epidemiology of Child Maltreatment and Associated Health Problems: Hong Kong's  
17 Experience. *J Pediatr* 2018;202:291-99 e1. doi: 10.1016/j.jpeds.2018.06.033 [published  
18 Online First: 2018/07/22]
- 19  
20 13. He B, Huang JV, Kwok MK, et al. The association of early-life exposure to air pollution with lung  
21 function at ~17.5 years in the "Children of 1997" Hong Kong Chinese Birth Cohort. *Environ Int*  
22 2019;123:444-50. doi: 10.1016/j.envint.2018.11.073 [published Online First: 2019/01/10]
- 23  
24 14. Tso W, Rao N, Jiang F, et al. Sleep Duration and School Readiness of Chinese Preschool Children. *J*  
25 *Pediatr* 2016;169:266-71. doi: 10.1016/j.jpeds.2015.10.064 [published Online First:  
26 2015/11/27]
- 27  
28 15. Ip P, Rao N, Bacon-Shone J, et al. Socioeconomic gradients in school readiness of Chinese  
29 preschool children: The mediating role of family processes and kindergarten quality. *Early*  
30 *Childhood Research Quarterly* 2016;35:111-23.
- 31  
32 16. Liu J, Au Yeung SL, He B, et al. The effect of birth weight on body composition: Evidence from a  
33 birth cohort and a Mendelian randomization study. *PLoS One* 2019;14(9):e0222141. doi:  
34 10.1371/journal.pone.0222141 [published Online First: 2019/09/11]
- 35  
36 17. Man KKC, Chan EW, Ip P, et al. Prenatal antidepressant use and risk of attention-  
37 deficit/hyperactivity disorder in offspring: population based cohort study. *Bmj*  
38 2017;357:j2350. doi: 10.1136/bmj.j2350 [published Online First: 2017/06/02]
- 39  
40 18. Man KKC, Coghill D, Chan EW, et al. Association of Risk of Suicide Attempts With  
41 Methylphenidate Treatment. *JAMA psychiatry* 2017;74(10):1048-55. doi:  
42 10.1001/jamapsychiatry.2017.2183 [published Online First: 2017/07/27]
- 43  
44 19. Man KKC, Lau WCY, Coghill D, et al. Association between methylphenidate treatment and risk of  
45 seizure: a population-based, self-controlled case-series study. *Lancet Child Adolesc Health*  
46 2020;4(6):435-43. doi: 10.1016/S2352-4642(20)30100-0 [published Online First:  
47 2020/05/26]
- 48  
49 20. Raman SR, Man KKC, Bahmanyar S, et al. Trends in attention-deficit hyperactivity disorder  
50 medication use: a retrospective observational study using population-based databases.  
51 *Lancet Psychiatry* 2018;5(10):824-35. doi: 10.1016/S2215-0366(18)30293-1 [published  
52 Online First: 2018/09/18]
- 53  
54 21. Adams HHH, Roshchupkin GV, DeCarli C, et al. Full exploitation of high dimensionality in brain  
55 imaging: The JPND working group statement and findings. *Alzheimers Dement (Amst)*  
56 2019;11:286-90. doi: 10.1016/j.dadm.2019.02.003 [published Online First: 2019/04/13]
- 57  
58 22. ABOUT JPND [cited 2020 July 28]. Available from:  
59 <https://www.neurodegenerationresearch.eu/about/> accessed 28 July 2020.
- 60  
61 23. Collaboration CGC. Inequality in outcomes for adolescents living with perinatally acquired HIV in  
62 sub-Saharan Africa: a Collaborative Initiative for Paediatric HIV Education and Research  
63 (CIPHER) Cohort Collaboration analysis. *J Int AIDS Soc* 2018;21 Suppl 1 doi:  
64 10.1002/jia2.25044 [published Online First: 2018/02/28]
- 65  
66 24. Collaborative Initiative for Paediatric HIV Education and Research (CIPHER) [cited 2020 July 28].  
67 Available from: <https://www.iasociety.org/CIPHER> accessed 28 July 2020.

- 1  
2  
3  
4 25. Biosocial Birth Cohort Research Network BBCR [cited 2020 July 28]. Available from:  
5 <https://www.ucl.ac.uk/anthropology/research/biosocial-birth-cohort-research-network-bbcr>  
6 accessed 28 July 2020.
- 7 26. Ilomaki J, Bell JS, Chan AYL, et al. Application of Healthcare 'Big Data' in CNS Drug Research: The  
8 Example of the Neurological and mental health Global Epidemiology Network (NeuroGEN).  
9 *CNS Drugs* 2020 doi: 10.1007/s40263-020-00742-4 [published Online First: 2020/06/24]
- 10 27. NEUROLOGICAL AND MENTAL HEALTH GLOBAL EPIDEMIOLOGY NETWORK [cited 2020 July 28].  
11 Available from: <https://www.neurogen.hku.hk/> accessed 28 July 2020.
- 12 28. As PENc, Andersen M, Bergman U, et al. The Asian Pharmacoepidemiology Network (AsPEN):  
13 promoting multi-national collaboration for pharmacoepidemiologic research in Asia.  
14 *Pharmacoepidemiol Drug Saf* 2013;22(7):700-4. doi: 10.1002/pds.3439 [published Online  
15 First: 2013/05/09]
- 16 29. Asian Pharmacoepidemiology Network [cited 2020 July 29]. Available from:  
17 <https://www.aspensig.asia/> accessed 29 July 2020.
- 18 30. Harron K, Doidge JC, Goldstein H. Assessing data linkage quality in cohort studies. *Ann Hum Biol*  
19 2020;47(2):218-26. doi: 10.1080/03014460.2020.1742379 [published Online First:  
20 2020/05/21]
- 21 31. About UK Biobank [cited 2020 September 9]. Available from:  
22 <https://www.ukbiobank.ac.uk/about-biobank-uk/> accessed 9 September 2020.
- 23 32. Hockley C, Quigley MA, Hughes G, et al. Linking Millennium Cohort data to birth registration and  
24 hospital episode records. *Paediatr Perinat Epidemiol* 2008;22(1):99-109. doi:  
25 10.1111/j.1365-3016.2007.00902.x [published Online First: 2008/01/05]
- 26 33. Geltman PL, Fried LE, Arsenault LN, et al. A planned care approach and patient registry to  
27 improve adherence to clinical guidelines for the diagnosis and management of attention-  
28 deficit/hyperactivity disorder. *Acad Pediatr* 2015;15(3):289-96. doi:  
29 10.1016/j.acap.2014.12.002 [published Online First: 2015/04/25]
- 30  
31  
32  
33  
34  
35  
36  
37  
38  
39  
40  
41  
42  
43  
44  
45  
46  
47  
48  
49  
50  
51  
52  
53  
54  
55  
56  
57  
58  
59  
60

1  
2  
3 **Figure legends**  
4  
5

6 **Figure 1** Method to generate batches. Abbreviation: dob, date of birth; M, male; F, female.  
7

8  
9 **Figure 2** Method to link data from cohort and CDARS in each batch. Abbreviation: dob, date  
10  
11 of birth; dx, diagnosis information; rx, prescription information.  
12  
13

14 **Figure 3** Method to calculate the rate of each step.  
15  
16  
17  
18  
19  
20  
21  
22  
23  
24  
25  
26  
27  
28  
29  
30  
31  
32  
33  
34  
35  
36  
37  
38  
39  
40  
41  
42  
43  
44  
45  
46  
47  
48  
49  
50  
51  
52  
53  
54  
55  
56  
57  
58  
59  
60

For peer review only

1  
2  
3  
4  
5  
6  
7  
8  
9  
10  
11  
12  
13  
14  
15  
16  
17  
18  
19  
20  
21  
22  
23  
24  
25  
26  
27  
28  
29  
30  
31  
32  
33  
34  
35  
36  
37  
38  
39  
40  
41  
42  
43  
44  
45  
46  
47  
48  
49  
50  
51  
52  
53  
54  
55  
56  
57  
58  
59  
60

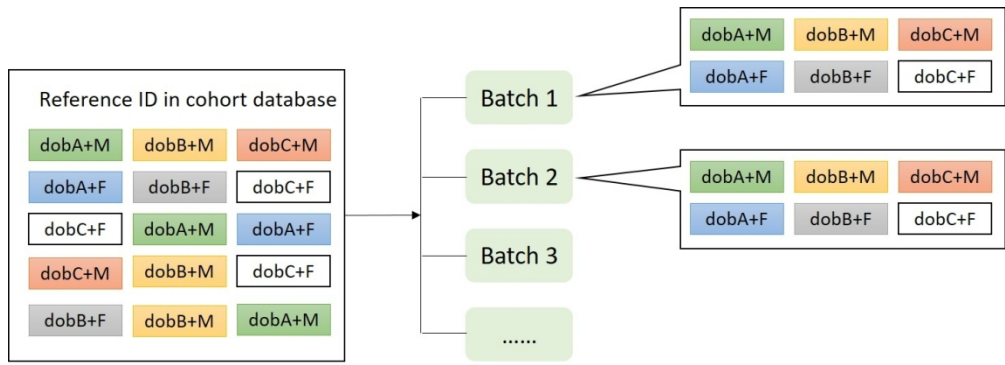

Figure 1 Method to generate batches. Abbreviation: dob, date of birth; M, male; F, female.

245x88mm (150 x 150 DPI)

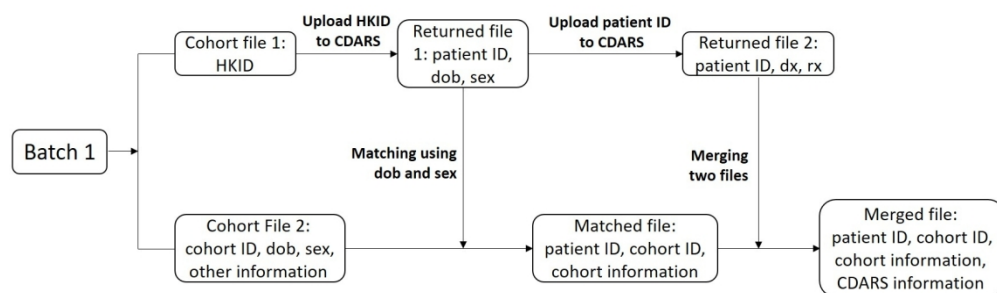

Figure 2 Method to link data from cohort and CDARS in each batch. Abbreviation: dob, date of birth; dx, diagnosis information; rx, prescription information.

295x89mm (150 x 150 DPI)



Equations:

1) valid Hong Kong Identity ID rate =  $\frac{\text{no. of valid HKID}}{\text{no. of submitted HKID}} \times 100\%$ ;

2) retrieved rate =  $\frac{\text{no. of retrieved records}}{\text{no. of valid HKID}} \times 100\%$ ;

3) crude match rate =  $\frac{\text{no. of crude match records}}{\text{no. of retrieved records}} \times 100\%$ ;

4) match rate after checking =  $\frac{\text{no. of matched records after checking}}{\text{no. of retrieved records}} \times 100\%$ ;

5) total link rate =  $\frac{\text{no. of matched records after checking}}{\text{no. of submitted Hong Kong Identity ID}} \times 100\%$ .

Figure 3 Method to calculate the rate of each step.

203x84mm (150 x 150 DPI)

# BMJ Open

## Linking cohort-based data with electronic health records: a proof-of-concept methodological study in Hong Kong

|                                 |                                                                                                                                                                                                                                                                                                                                                                                                                                                                                                                                                                                                                                                                                                                                                                                                                                                                                                                                                                                                                                                                                                                                                                                                                                                                                                                                                                                                                                                                                                                                                                                                                                                                                                                                                                                                                                                                                                                                               |
|---------------------------------|-----------------------------------------------------------------------------------------------------------------------------------------------------------------------------------------------------------------------------------------------------------------------------------------------------------------------------------------------------------------------------------------------------------------------------------------------------------------------------------------------------------------------------------------------------------------------------------------------------------------------------------------------------------------------------------------------------------------------------------------------------------------------------------------------------------------------------------------------------------------------------------------------------------------------------------------------------------------------------------------------------------------------------------------------------------------------------------------------------------------------------------------------------------------------------------------------------------------------------------------------------------------------------------------------------------------------------------------------------------------------------------------------------------------------------------------------------------------------------------------------------------------------------------------------------------------------------------------------------------------------------------------------------------------------------------------------------------------------------------------------------------------------------------------------------------------------------------------------------------------------------------------------------------------------------------------------|
| Journal:                        | <i>BMJ Open</i>                                                                                                                                                                                                                                                                                                                                                                                                                                                                                                                                                                                                                                                                                                                                                                                                                                                                                                                                                                                                                                                                                                                                                                                                                                                                                                                                                                                                                                                                                                                                                                                                                                                                                                                                                                                                                                                                                                                               |
| Manuscript ID                   | bmjopen-2020-045868.R1                                                                                                                                                                                                                                                                                                                                                                                                                                                                                                                                                                                                                                                                                                                                                                                                                                                                                                                                                                                                                                                                                                                                                                                                                                                                                                                                                                                                                                                                                                                                                                                                                                                                                                                                                                                                                                                                                                                        |
| Article Type:                   | Original research                                                                                                                                                                                                                                                                                                                                                                                                                                                                                                                                                                                                                                                                                                                                                                                                                                                                                                                                                                                                                                                                                                                                                                                                                                                                                                                                                                                                                                                                                                                                                                                                                                                                                                                                                                                                                                                                                                                             |
| Date Submitted by the Author:   | 29-Mar-2021                                                                                                                                                                                                                                                                                                                                                                                                                                                                                                                                                                                                                                                                                                                                                                                                                                                                                                                                                                                                                                                                                                                                                                                                                                                                                                                                                                                                                                                                                                                                                                                                                                                                                                                                                                                                                                                                                                                                   |
| Complete List of Authors:       | GAO, Le; University of Hong Kong, Centre for Safe Medication Practice and Research, Department of Pharmacology and Pharmacy<br>Leung, Miriam T Y; University of Hong Kong, Centre for Safe Medication Practice and Research, Department of Pharmacology and Pharmacy<br>Li, Xue; University of Hong Kong, Department of Medicine; University of Hong Kong, Centre for Safe Medication Practice and Research, Department of Pharmacology and Pharmacy<br>Chui, Celine; University of Hong Kong, School of Nursing; University of Hong Kong, School of Public Health<br>Wong, Rosa Sze Man; University of Hong Kong, Department of Paediatrics and Adolescent Medicine<br>Au Yeung, Shiu Lun; University of Hong Kong, School of Public Health<br>Chan, Edward; University of Hong Kong, Centre for Safe Medication Practice and Research, Department of Pharmacology and Pharmacy<br>Chan, Adrienne; University of Hong Kong, Centre for Safe Medication Practice and Research, Department of Pharmacology and Pharmacy<br>Chan, Esther; University of Hong Kong, Centre for Safe Medication Practice and Research, Department of Pharmacology and Pharmacy<br>Wong, HSW; University of Hong Kong, Department of Paediatrics & Adolescent Medicine<br>Lee, Tatia; University of Hong Kong, Department of Psychology<br>Rao, Nirmala; University of Hong Kong, Faculty of Education<br>Wing, Yun-Kwok; The Chinese University of Hong Kong, Department of Psychiatry<br>Lum, Terry; University of Hong Kong, Department of Social Work and Social Administration<br>Leung, Gabriel; University of Hong Kong, School of Public Health<br>Ip, Patrick; University of Hong Kong, Department of Paediatrics and Adolescent Medicine<br>Wong, Ian C. K.; University of Hong Kong, Centre for Safe Medication Practice and Research, Department of Pharmacology and Pharmacy; UCL, Research Department of Practice and Policy, UCL School of Pharmacy |
| <b>Primary Subject Heading</b>: | Epidemiology                                                                                                                                                                                                                                                                                                                                                                                                                                                                                                                                                                                                                                                                                                                                                                                                                                                                                                                                                                                                                                                                                                                                                                                                                                                                                                                                                                                                                                                                                                                                                                                                                                                                                                                                                                                                                                                                                                                                  |
| Secondary Subject Heading:      | Paediatrics, Public health, Epidemiology                                                                                                                                                                                                                                                                                                                                                                                                                                                                                                                                                                                                                                                                                                                                                                                                                                                                                                                                                                                                                                                                                                                                                                                                                                                                                                                                                                                                                                                                                                                                                                                                                                                                                                                                                                                                                                                                                                      |
| Keywords:                       | STATISTICS & RESEARCH METHODS, PAEDIATRICS, EPIDEMIOLOGY, PUBLIC HEALTH                                                                                                                                                                                                                                                                                                                                                                                                                                                                                                                                                                                                                                                                                                                                                                                                                                                                                                                                                                                                                                                                                                                                                                                                                                                                                                                                                                                                                                                                                                                                                                                                                                                                                                                                                                                                                                                                       |

1  
2  
3  
4  
5  
6  
7  
8  
9  
10  
11  
12  
13  
14  
15  
16  
17  
18  
19  
20  
21  
22  
23  
24  
25  
26  
27  
28  
29  
30  
31  
32  
33  
34  
35  
36  
37  
38  
39  
40  
41  
42  
43  
44  
45  
46  
47  
48  
49  
50  
51  
52  
53  
54  
55  
56  
57  
58  
59  
60

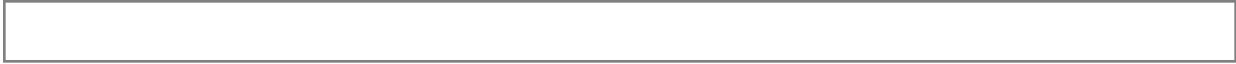

SCHOLARONE™  
Manuscripts



I, the Submitting Author has the right to grant and does grant on behalf of all authors of the Work (as defined in the below author licence), an exclusive licence and/or a non-exclusive licence for contributions from authors who are: i) UK Crown employees; ii) where BMJ has agreed a CC-BY licence shall apply, and/or iii) in accordance with the terms applicable for US Federal Government officers or employees acting as part of their official duties; on a worldwide, perpetual, irrevocable, royalty-free basis to BMJ Publishing Group Ltd ("BMJ") its licensees and where the relevant Journal is co-owned by BMJ to the co-owners of the Journal, to publish the Work in this journal and any other BMJ products and to exploit all rights, as set out in our [licence](#).

The Submitting Author accepts and understands that any supply made under these terms is made by BMJ to the Submitting Author unless you are acting as an employee on behalf of your employer or a postgraduate student of an affiliated institution which is paying any applicable article publishing charge ("APC") for Open Access articles. Where the Submitting Author wishes to make the Work available on an Open Access basis (and intends to pay the relevant APC), the terms of reuse of such Open Access shall be governed by a Creative Commons licence – details of these licences and which [Creative Commons](#) licence will apply to this Work are set out in our licence referred to above.

Other than as permitted in any relevant BMJ Author's Self Archiving Policies, I confirm this Work has not been accepted for publication elsewhere, is not being considered for publication elsewhere and does not duplicate material already published. I confirm all authors consent to publication of this Work and authorise the granting of this licence.

1  
2  
3 **Linking cohort-based data with electronic health records: a proof-of-concept**  
4  
5 **methodological study in Hong Kong**  
6  
7

8 Le Gao<sup>1</sup>, Miriam TY Leung<sup>1</sup>, Xue Li<sup>1,2</sup>, Celine SL Chui<sup>3,4</sup>, Rosa S Wong<sup>5</sup>, Shiu Lun Au  
9  
10 Yeung<sup>4</sup>, Edward WW Chan<sup>1</sup>, Adrienne YL Chan<sup>1</sup>, Esther W Chan<sup>1</sup>, Wilfred HS Wong<sup>5</sup>, Tatia  
11  
12 MC Lee<sup>6</sup>, Nirmala Rao<sup>7</sup>, YK Wing<sup>8</sup>, Terry YS Lum<sup>9</sup>, Gabriel M Leung<sup>4</sup>, Patrick Ip<sup>5</sup>, Ian CK  
13  
14 Wong<sup>1,10+</sup>  
15  
16

17  
18 <sup>1</sup>Centre for Safe Medication Practice and Research, Department of Pharmacology and  
19 Pharmacy, Li Ka Shing Faculty of Medicine, the University of Hong Kong, Hong Kong

20  
21 <sup>2</sup>Department of Medicine, Li Ka Shing Faculty of Medicine, the University of Hong Kong,  
22 Hong Kong

23  
24 <sup>3</sup>School of Nursing, Li Ka Shing Faculty of Medicine, the University of Hong Kong, Hong  
25 Kong

26  
27 <sup>4</sup>School of Public Health, Li Ka Shing Faculty of Medicine, the University of Hong Kong,  
28 Hong Kong

29  
30 <sup>5</sup>Department of Paediatrics and Adolescent Medicine, Li Ka Shing Faculty of Medicine, the  
31 University of Hong Kong, Hong Kong

32  
33 <sup>6</sup>Department of Psychology, the University of Hong Kong, Hong Kong

34  
35 <sup>7</sup>Faculty of Education, the University of Hong Kong, Hong Kong

36  
37 <sup>8</sup>Department of Psychiatry, the Chinese University of Hong Kong, Hong Kong

38  
39 <sup>9</sup>Department of Social Work and Social Administration, Faculty of Social Science, the  
40 University of Hong Kong, Hong Kong

41  
42 <sup>10</sup>Research Department of Practice and Policy, UCL School of Pharmacy, London, United  
43 Kingdom  
44  
45

46  
47  
48 <sup>+</sup>Corresponding Author: Ian C K Wong, Department of Pharmacology and Pharmacy, 2/F  
49 Laboratory Block, 21 Sassoon Road, Li Ka Shing Faculty of Medicine, the University of  
50 Hong Kong, Email: [wongick@hku.hk](mailto:wongick@hku.hk), Tel: (852) 3917-9160, Fax: (852) 2817-0859.  
51  
52  
53  
54  
55  
56  
57  
58  
59  
60

## Abstract

**Objectives** Data linkage of cohort-based data and electronic health records (EHRs) has been practiced in many countries, but in Hong Kong there is still a lack of such research. To expand the use of multi-source data, we aimed to identify a feasible way of linking two cohorts with EHRs in Hong Kong.

**Method** Participants in the “Children of 1997” Birth Cohort and the Chinese Early Development Instrument (CEDI) Cohort were separated into several batches. The Hong Kong Identity Card Numbers (HKIDs) of each batch were then uploaded to the Hong Kong Clinical Data Analysis and Reporting System (CDARS) to retrieve EHRs. Within the same batch, each participant has a unique combination of date of birth and sex which can then be used for exact matching, as no HKIDs are returned in CDARS. Raw data collected for the two cohorts were checked for the mismatched cases. After the matching, we conducted a simple descriptive analysis of attention deficit hyperactivity disorder (ADHD) information collected in the CEDI cohort SWAN survey and EHRs.

**Results** In total, 3,473 and 910 HKIDs in the Birth Cohort and CEDI cohort were separated into 44 and 5 batches respectively and then submitted to the CDARS, with 100% and 97% being valid HKIDs respectively. The match rates were confirmed to be 100% and 99.75% after checking the cohort data. From our illustration using the ADHD information in the CEDI cohort, 36 (4.47%) individuals had ADHD–Combined score over the clinical cut-off in the SWAN survey, and 68 (8.31%) individuals had ADHD records in EHRs.

**Conclusions** Using date of birth and sex as identification variables, we were able to link the cohort data and EHRs with high match rates. This method will assist in the generation of databases for future multi-disciplinary research using both cohort data and EHRs.

### Strengths and limitations of this study

- Our study links cohort data with a regionwide electronic healthcare database that covers more than 90% of inpatient services and more than 80% of outpatient services in Hong Kong.
- The use of date of birth and sex as identification variables for exact matching is easy and feasible and is highly accurate as it is not likely to be affected by recall bias.
- Privacy is well-protected in the process of data linkage through the separate management of different documents.
- The use of date of birth and sex as identification variables is less efficient when linking data which needs to be split into many batches.
- Inherent problems within the different data sources, such as erroneous data entries in the cohort data and EHRs, including data from public settings only, can complicate the data linkage process and the use of linked data.

**Contribution** PI, and ICKW conceptualised and designed the study. LG, MTYL, EWWC, and AYLC were equally involved in EHRs data collection and management. RSW, WHSW, PI, SLAY, and GML were responsible for quality control of accuracy and integrity of the cohort data. EWWC analysed the data, and LG cross-checked the analysis. LG, MTYL, XL, CSLC, RSW, SLAY, AYLC, EWC, TMCL, NR, YKW, TYSL, GML, PI, ICKW interpreted the data. LG, MTYL and XL drafted the initial manuscript; XL, CSLC, EWWC, AYLC, EWC, TMCL, NR, YKW, TYSL, GML, PI and ICKW critically reviewed the manuscript for important intellectual content. All authors contributed to and approved the final draft. All authors agree to be accountable for all aspects of the work and any issues related to the accuracy or integrity of any part of the work. The corresponding author attests that all listed authors meet the authorship criteria and that no others meeting the criteria have been omitted.

1  
2  
3 **Funding** This study was supported by Hong Kong Research Grants Council Collaborative  
4  
5 Research Fund (No. C7009-19GF).  
6  
7

8 **Competing interests statement** None declared.  
9

10  
11 **Patient consent for publication** Not required.  
12

13  
14 **Ethics approval** The study protocols were approved by the Institutional Review Board of the  
15  
16 University of Hong Kong/ Hospital Authority Hong Kong West Cluster (Reference No. UW  
17  
18 13-056 for the CEDI Cohort and Reference No UW13-367 and UW15-412 for “Children of  
19  
20 1997” Birth Cohort, Reference No UW 19-517 for this project). Parents/ guardians of  
21  
22 participants or participants 18 years or older, were asked to provide informed written consent  
23  
24 agreeing to take part.  
25  
26

27  
28 **Data availability statement** Data are available upon reasonable request. Data from the study  
29  
30 can be requested from the corresponding author.  
31  
32

33 **Acknowledgments:** We would like to thank the Hong Kong Hospital Authority for access to  
34  
35 the data from CDARS for research purposes. We also thank Dr Liz Jamieson for  
36  
37 proofreading the manuscript.  
38  
39

40  
41 **Word count** 2867  
42  
43  
44  
45  
46  
47  
48  
49  
50  
51  
52  
53  
54  
55  
56  
57  
58  
59  
60



## Introduction

In epidemiological studies, both cohort-based data and registry/hospital-based electronic health records (EHRs) are useful data sources, each of them having strengths and weaknesses. Cohort-based surveys usually focus on a specific topic of interest<sup>1</sup>, such as health examination, biological indicators, socioeconomic information, lifestyle information including income, education, exercise, and diet, or other qualitative data from questionnaires or interviews. However, they usually have limited years of follow-up with suboptimal follow-up rate<sup>2</sup>; they are labour-intensive for data collection and management<sup>3</sup>, and may lack statistical power or suitable variables to address new research questions beyond the initial cohort establishment due to inadequate sample sizes. Clinical data management systems such as EHRs, are real-time, and recorded as part of daily clinical practice or population management, and usually cover a large population. They include information on diagnosis, prescriptions, laboratory tests, and payment information, etc that can facilitate the cost effectiveness of long-term follow-up<sup>4 5</sup>. However, EHRs rely on information routinely collected in clinical settings. Some fundamental risk factors including social, behavioural and environmental factors, and patient-reported outcomes are not well documented in EHRs compared to other epidemiological studies like cohort studies<sup>4</sup>.

Considering the strengths and limitations of different data sources, the opportunity to link data using different data collection methods and across different settings would potentially enable a wider range of research questions to be addressed. With the development of interdisciplinary research and big-data analytics, there is a trend of using record-linkage technologies to utilize the data from different settings. It is also very important to assess the validity and practicability of the record-linkage beforehand to make sure that it is useful for researchers<sup>6</sup>. In many countries including Australia<sup>7</sup>, the US<sup>8</sup>, Scotland<sup>9</sup>, New Zealand<sup>10</sup>, China<sup>11</sup>, etc, data-linkage has been practiced in medical and social research.

1  
2  
3 To the best of our knowledge, only one other similar data-linkage study has been conducted  
4 in Hong Kong. It linked data from the social service databases and EHRs by obtaining the  
5 direct linkage from the Hong Kong Hospital Authority (HA)<sup>12</sup>. As the data was owned by the  
6 Government and it was a one-off linkage, it is not possible to maintain the databases as a  
7 longitudinal dataset to evaluate long-term outcomes of children. Therefore, in this study, we  
8 aim to identify a feasible way to link data from two previously established cohorts of children  
9 and EHRs, to provide methodological fundamentals for the life trajectory and long-term  
10 assessment of various health conditions in Hong Kong.  
11  
12  
13  
14  
15  
16  
17  
18  
19  
20  
21  
22  
23  
24

## 25 **Method**

### 26 **Data source**

27  
28 We performed the record linkage of two cohort studies with the Clinical Data Analysis and  
29 Reporting System (CDARS), an electronic database used by the public healthcare system in  
30 Hong Kong. The “Children of 1997” Birth Cohort,<sup>13</sup> established by the School of Public  
31 Health at the University of Hong Kong (HKU) and the Department of Health, is one of Asia's  
32 largest birth cohorts. The study successfully recruited over 8,300 babies born in 1997. Since  
33 2007, direct contact with subjects has been re-established and postal surveys have been  
34 regularly conducted in the entire cohort. 3,618 subjects participated in the Biobank clinical  
35 follow-up study for assessing body composition and provided biospecimens for biobanking  
36 from 2013-2018. They also consented to record linkage for future health-related studies. The  
37 second cohort is the Chinese Early Development Instrument (CEDI) Cohort, which was  
38 established in 2011 by the Department of Paediatrics & Adolescent Medicine at HKU to  
39 study the impact of socioeconomic disparity on child health and development. Stratified  
40 samples of K3 children from high-income and low-income districts were successfully  
41  
42  
43  
44  
45  
46  
47  
48  
49  
50  
51  
52  
53  
54  
55  
56  
57  
58  
59  
60

1  
2  
3 recruited in 2011/12 (K3, 5-6 years, N=567). These children were followed up in 2014/15  
4  
5 (Grade 3, 8-9 years, N=519, N=832 with chain-referral) and 2018/19 (Grade 7, 12-13 years,  
6  
7 ongoing, expected N=583 with chain referral), respectively with retention of >80%<sup>14 15</sup>.

8  
9  
10 Parents/ guardians of participants in the two cohorts, or participants 18 years or older, were  
11  
12 asked to provide informed written consent agreeing to the use of their Hong Kong Identity  
13  
14 Card Number (HKID) for record-linkage and longitudinal follow-up for clinical research.

15  
16 Each of them provided their HKID voluntarily<sup>15 16</sup>.

17  
18  
19  
20 CDARS is an electronic database that includes EHRs since 1995 from all public hospitals and  
21  
22 clinics in Hong Kong. It contains anonymised inpatient, outpatient (ambulatory care), and  
23  
24 emergency department admissions records to protect patient confidentiality. Information  
25  
26 including diagnosis, hospital admissions and discharges, payment method, and prescription  
27  
28 and dispensing information are recorded in CDARS. Data from CDARS has been validated  
29  
30 and used in many previous epidemiological studies on children's neurodevelopment  
31  
32 disorders<sup>17-20</sup>.

### 33 34 35 36 **Record-linkage process**

37  
38  
39 Individuals in the two cohorts who provided HKID were included. We completed the record-  
40  
41 linkage in 4 steps:

- 42  
43  
44  
45 1) Firstly, we used the combination of date of birth and sex to generate a reference ID in  
46  
47 each cohort database; we then separated all the participants into several batches and  
48  
49 ensured, within the same batch, each participant had a unique reference ID (Figure 1).
  - 50  
51  
52 2) Secondly, we used the HKID in each batch to retrieve their patient ID, sex and date of  
53  
54 birth from CDARS. At this stage, the CDARS should return the number of valid  
55  
56 HKIDs uploaded and identify invalid HKIDs if any (Equation 1).
- 57  
58  
59  
60

- 1  
2  
3 3) Due to the protection of patient privacy, only the patient ID, but not the HKID can be  
4 returned upon request in CDARS. Thus, for records with valid HKIDs, we used  
5  
6 unique combinations of date of birth and sex retrieved from CDARS (Equation 2) for  
7  
8 further matching in each batch with the information from the cohort database  
9  
10 (Equation 3) to shorten the matching time.  
11  
12  
13  
14  
15 4) For those mismatched cases, we checked the raw data collected for the two cohorts  
16  
17 (questionnaires in paper format) to exclude the possibility of data entry errors and  
18  
19 ensure the highest match rate (Equation 4).  
20  
21

22 To protect data security and patient privacy, we separated the management of cohort ID,  
23  
24 HKID and patient ID. The data retrieval process and record-linkage flow are illustrated in  
25  
26 Figure 2. EC had access to the cohort data including cohort ID (not HKID), generated the  
27  
28 matching batches. ML, the only person who had access to both HKID and cohort ID, then  
29  
30 uploaded HKID and retrieved patient ID from CDARS data by batches, but was not included  
31  
32 in the data management and analysis. LG did the batch splitting independently for quality  
33  
34 control as well as the remaining analysis.  
35  
36  
37  
38

### 39 **Reported outcomes**

40  
41  
42 To evaluate the success of our data linkage method, validated HKID rate, CDARS retrieved  
43  
44 rate, crude match rate, match rate after checking and total link rate were calculated using the  
45  
46 equations in Figure 3.  
47  
48

49 In addition, after the data linkage, we took attention deficit hyperactivity disorder (ADHD) as  
50  
51 an example and conducted a simple descriptive analysis in the CEDI cohort to compare the  
52  
53 survey results and EHRs in CDARS. In the CEDI cohort, two surveys using the Strengths and  
54  
55 Weaknesses of ADHD Symptoms and Normal-Behaviors (SWAN) questionnaire were  
56  
57 conducted in the primary school phase (March 2014 - Dec 2015) and the secondary school  
58  
59  
60

1  
2  
3 phase (June 2018 - September 2019). We used both clinical cut-off and alternative  
4  
5 (borderline) cut-off<sup>21</sup> to identify individuals who scored above the threshold in three domains.  
6  
7 Also, EHRs of ADHD in these matched participants were summarised using the International  
8  
9 Classification of Diseases, Ninth Revision, Clinical Modification (ICD-9-CM) code of 314  
10  
11 for the ADHD diagnosis, and the drug name of methylphenidate, atomoxetine, and modafinil  
12  
13 for the ADHD medication prescription.  
14  
15

16  
17 Microsoft Excel<sup>®</sup> and R v3.6.1 were used for data manipulation and analysis.  
18  
19

## 20 21 **Patient and public involvement**

22  
23 This is a methodological study to assess the feasibility of a data-linkage method. Patients  
24  
25 and/or the public were not involved in the design, conduct, reporting, or dissemination plans  
26  
27 of this research.  
28  
29

## 30 31 32 33 **Results**

34  
35 In total, at the time of analyses, there were 3,473 HKIDs within 44 batches in the Birth  
36  
37 Cohort submitted to the CDARS and all of these HKIDs were valid with successful data  
38  
39 retrieval from the system. Of the 3,473 children included in the Birth Cohort, 95.85% had at  
40  
41 least one public hospital/ clinic attendance up to the end of 2019, and were successfully  
42  
43 matched from cohort data to CDARS data. For the 910 children separated into 5 batches in  
44  
45 the CEDI cohort, 889 of them provided valid HKID, and 820 of them had records in CDARS.  
46  
47 The crude match rate was 93.05%, and the match rate was increased to 99.75% after checking  
48  
49 the raw data about the date of birth and sex records in the CEDI Cohort. The rate of each  
50  
51 match step is shown in Table 1.  
52  
53  
54  
55  
56  
57  
58  
59  
60

**Table 1** Data-linkage rate in each step

|                                     | <b>“Children of 1997”<br/>Birth Cohort</b> | <b>CEDI Cohort</b> |
|-------------------------------------|--------------------------------------------|--------------------|
| <b>Submitted N</b>                  | 3473                                       | 910                |
| <b>Valid N (%)</b>                  | 3473 (100)                                 | 889 (97.69)        |
| <b>Retrieved N (%)</b>              | 3329 (95.85)                               | 820 (92.24)        |
| <b>Crude match N (%)</b>            | 3321 (99.76)                               | 763 (93.05)        |
| <b>Matched after checking N (%)</b> | 3329 (100)                                 | 818 (99.75)        |
| <b>Total link rate (%)</b>          | 95.85                                      | 89.89              |

For peer review only

**Table 2** Summary of ADHD information in CEDI cohort

|                                                                  | Female      | Male        | Total       |
|------------------------------------------------------------------|-------------|-------------|-------------|
| <b>Cohort SWAN information</b>                                   |             |             |             |
| No. of individuals answering the survey (%)                      | 359 (44.54) | 447 (55.46) | 806 (100)   |
| No. of individuals with ADHD-C score over clinical cutoff (%)    | 11 (3.06)   | 25 (5.59)   | 36 (4.47)   |
| No. of individuals with ADHD-I score over clinical cutoff (%)    | 18 (5.01)   | 27 (6.04)   | 45 (5.58)   |
| No. of individuals with ADHD-HI score over clinical cutoff (%)   | 10 (2.79)   | 24 (5.37)   | 34 (4.22)   |
| No. of individuals with ADHD-C score over borderline cutoff (%)  | 34 (9.47)   | 105 (23.49) | 139 (17.25) |
| No. of individuals with ADHD-I score over borderline cutoff (%)  | 69 (19.22)  | 96 (21.48)  | 165 (20.47) |
| No. of individuals with ADHD-HI score over borderline cutoff (%) | 52 (14.48)  | 72 (16.11)  | 124 (15.38) |
| <b>CDARS EHRs information</b>                                    |             |             |             |
| No. of final matched (%)                                         | 366 (44.74) | 452 (55.26) | 818 (100)   |
| No. of individuals with ADHD diagnosis (%)                       | 14 (3.83)   | 40 (8.85)   | 54 (6.60)   |
| No. of individuals with ADHD medication (%)                      | 13 (3.55)   | 47 (10.40)  | 60 (7.33)   |
| No. of individuals with ADHD diagnosis or medication (%)         | 15 (4.10)   | 53 (11.73)  | 68 (8.31)   |
| <b>In individuals with ADHD diagnosis or medication</b>          |             |             |             |
| No. of individuals (%)                                           | 15 (22.06)  | 53 (77.94)  | 68 (100)    |
| No. of individuals with ADHD-C score over clinical cutoff (%)    | 0 (0.00)    | 16 (30.19)  | 16 (23.53)  |
| No. of individuals with ADHD-I score over clinical cutoff (%)    | 2 (13.33)   | 16 (30.19)  | 18 (26.47)  |
| No. of individuals with ADHD-HI score over clinical cutoff (%)   | 2 (13.33)   | 13 (24.53)  | 15 (22.06)  |
| No. of individuals with ADHD-C score over borderline cutoff (%)  | 8 (53.33)   | 36 (67.92)  | 44 (64.71)  |
| No. of individuals with ADHD-I score over borderline cutoff (%)  | 11 (73.33)  | 36 (67.92)  | 47 (69.12)  |
| No. of individuals with ADHD-HI score over borderline cutoff (%) | 8 (53.33)   | 31 (58.49)  | 39 (57.35)  |

Note: ADHD-C, ADHD–Combined; ADHD-I, ADHD–Inattentive; ADHD-HI, ADHD–Hyperactivity/Impulsivity.

1  
2  
3 The information of ADHD in the CEDI cohort is summarised in Table 2. In 806 individuals  
4 who answered at least one survey, 4.47%, 5.58% and 4.22% of these individuals had an  
5 ADHD–Combined score, ADHD–Inattentive score, and ADHD–Hyperactivity/Impulsivity  
6 score over the clinical cut-off. After the data linkage, we found 54 individuals had at least one  
7 diagnosis of ADHD, and 60 individuals had the prescription record of ADHD medication.  
8  
9 Then we compared the ADHD information from the cohort survey and the EHRs. Of the 68  
10 individuals who had a history of ADHD diagnosis or medication treatment, less than 30% of  
11 them had scores in three domains above the clinical cut-off and more than half of them had  
12 scores above the borderline cut-off.  
13  
14  
15  
16  
17  
18  
19  
20  
21  
22  
23  
24  
25  
26  
27

## 28 Discussion

29  
30 In recent years, with the increasing use of electronic mobile devices, investigation and  
31 follow-up in cohort studies have become easier to implement, so a large number of cohort  
32 studies were set up and related networks were formed to collaborate, such as the EU Joint  
33 Programme – Neurodegenerative Disease Research (JPND)<sup>22 23</sup>, Collaborative Initiative for  
34 Paediatric HIV Education and Research (CIPHER) Global Cohort Collaboration<sup>24 25</sup> and  
35 Biosocial Birth Cohort Research (BBCR) Network<sup>26</sup>. Meanwhile, many big data networks  
36 integrate EHRs for research, for example, the Neurological and mental health Global  
37 Epidemiology Network (NeuroGEN)<sup>27 28</sup> and the Asian Pharmacoepidemiology Network  
38 (AsPEN)<sup>29 30</sup>. These two kinds of data are both valuable for epidemiological research on  
39 different topics, with the potential to be used in both policy and social research too. Cohort  
40 studies can obtain more detailed and customised variables while EHRs can provide more data  
41 that are less subject to attrition or response bias<sup>31</sup>. Therefore, making full use of these two  
42 kinds of data will increase the scope for research. There are already good practices for linking  
43  
44  
45  
46  
47  
48  
49  
50  
51  
52  
53  
54  
55  
56  
57  
58  
59  
60



1  
2  
3 cohort studies to EHRs in other countries, for example, the UK Biobank has been linked to  
4  
5 different kinds of EHRs<sup>32</sup>. However, there is still a lack of studies that utilize both cohort  
6  
7 studies and EHRs in Hong Kong and examine the feasibility and implications of the linkage.  
8  
9

10 Due to the different information contained in each database and the data request method,  
11  
12 there are various ways to link to different databases in different parts of the world. For  
13  
14 example, Peacock et al<sup>33</sup> used the name, address, date of birth and gender as the Master  
15  
16 Linkage Key to link the cohort data with other health records; in the UK Biobank, NHS  
17  
18 number together with other identifiers (name, date of birth, address, general practice, phone  
19  
20 numbers and e-mail addresses) were used for the follow-up and the linkage with EHRs<sup>34</sup>. In  
21  
22 this study, we used date of birth and sex to identify and match the individuals' data across  
23  
24 different data sources. The matching rate after checking the original cohort data was 100%  
25  
26 for the "Children of 1997" Birth Cohort and 99.75% for the CEDI Cohort. The total link rates  
27  
28 of the two cohorts of 95.85% and 89.89% were lower than the matched rates after checking,  
29  
30 mainly because we included those without public hospital visits as well as those who  
31  
32 provided an invalid HKID in the denominator for calculation. Our link rates were comparable  
33  
34 with a similar data linkage study in the United Kingdom<sup>35</sup>, where out of the 90% who gave  
35  
36 consent for data linkage, 99% of the Millennium Cohort were linked with birth registration  
37  
38 data and 83% linked with hospital record data.  
39  
40  
41  
42  
43  
44  
45

46 Although we do not have a direct way of linking the data of each individual using their HKID  
47  
48 collected from the cohort, the use of date of birth and sex to conduct exact matching is an  
49  
50 easy and feasible way of avoiding some potentially complex approval processes. The  
51  
52 identification variables for the exact matching, date of birth and sex, are fixed demographics,  
53  
54 which are easy to collect in various types of studies and not subject to recall bias, so the  
55  
56 accuracy of these factors is relatively high. Also, CDARS has already linked HKID with birth  
57  
58 registry data with accurate information on data of birth and sex, which can be used as the  
59  
60

1  
2  
3 unique identifier within each batch. Another advantage of this study is that we can use  
4  
5 HKIDs which were collected from cohorts to retrieve data from CDARS followed by exact  
6  
7 matching using the date of birth and sex to maintain patient privacy. The use of HKID allows  
8  
9 us to obtain data from CDARS, but at the same time, CDARS will not return data with  
10  
11 HKID, which makes the privacy of non-consented patients well-protected. Also, in our study,  
12  
13 HKID and other cohort information were stored in separate files and kept by different  
14  
15 researchers, which further strengthened the protection of privacy.  
16  
17  
18  
19

20 The first limitation of this study is that we need to split all individuals into several batches so  
21  
22 that the individuals in each group have a unique combination of date of birth and sex. There  
23  
24 were 44 batches in the “Children of 1997” Birth Cohort. Therefore, this method is less  
25  
26 efficient when linking data with large sample sizes, for example, millions of individuals,  
27  
28 especially in cohorts with relatively concentrated dates of birth because it is time-consuming  
29  
30 to split the data into thousands of batches, and then upload them by batch and load the data  
31  
32 from CDARS. However, for a general cohort study, the sample size may not be so large and  
33  
34 the dates of birth not too concentrated, so this method can be applied to link cohort studies  
35  
36 and EHRs in Hong Kong. One of the obstacles identified in our study was erroneous data  
37  
38 entries that arose from the transcription of written responses of the paper questionnaire to the  
39  
40 electronic database. We overcame the obstacle by manually checking the physical copies of  
41  
42 the questionnaires, which is labour-intensive and therefore not so practical for large cohort  
43  
44 studies. Such transcribing errors can be eliminated or reduced by using electronic  
45  
46 questionnaires to collect responses in future cohort studies. Another issue is that the CDARS  
47  
48 data are collected by the HA from public hospitals, so that only individuals who had utilised  
49  
50 public hospital services can be linked. Only around 5% of our cohort with valid HKIDs had  
51  
52 not utilized public hospitals and were not linked. Similarly, the lower than expected  
53  
54  
55  
56  
57  
58  
59  
60

1  
2  
3 prevalence of the diseases reported may be due to the inclusion of people who do not  
4 frequently go to public hospitals, leading to underestimation of the prevalence. In future  
5 studies on disease epidemiology, we can consider using the number of individuals who  
6 frequently visit the public hospital as the denominator to eliminate such bias.  
7  
8  
9

10  
11  
12 We linked two cohorts with the EHRs and were able to achieve almost all matching of  
13 subjects (both >99%). The resultant longitudinal databases will allow researchers in Hong  
14 Kong to conduct long-term studies on neurodevelopmental disorders such as ADHD and  
15 Autism Spectrum Disorder. Although many countries have developed longitudinal cohorts  
16 (databases or registries) to systematically collect data on patients with ADHD<sup>36</sup>, Hong Kong  
17 lacks a comparable cohort and an evidence-based policy to tackle the challenges of treating  
18 patients with ADHD locally. Establishing an ADHD cohort with record linkage from  
19 multiple datasets is essential to investigate the long-term impact of ADHD and inform  
20 policymakers on effective management and support of patients through their life trajectory.  
21  
22 Based on the established cohorts of children in Hong Kong developed by the research teams  
23 for various proposes, this study developed a record linkage model to link project-based data  
24 and routine clinical data and assess the impact of ADHD on health outcomes, education  
25 attainment, and social service utilization. Data collected in these cohort studies are for  
26 specific purposes, and when linking them with EHRs, we are able to obtain more  
27 comprehensive information for analysis. Take the CEDI as an example, the SWAN  
28 questionnaire was used to identify the ADHD symptoms, and socio-economic information  
29 was also available. After linking the cohort data with hospital-based data, not only can we use  
30 complementary data, such as the clinical diagnosis, prescription and admission records which  
31 are not available in the cohort data but also the socio-economic information lacking in the  
32 hospital-based database, for life-long follow-up.  
33  
34  
35  
36  
37  
38  
39  
40  
41  
42  
43  
44  
45  
46  
47  
48  
49  
50  
51  
52  
53  
54  
55  
56  
57  
58  
59  
60

1  
2  
3 The linking method established in this study has proved to be effective and, to a large extent,  
4 ensures the privacy of individuals. There are some limitations from cohort studies or medical  
5 databases, but overall it will provide a good basis for linking these types of data in the future  
6  
7  
8 allowing us to expand the use of richer data resources and to be able to answer further  
9  
10  
11  
12 research questions.  
13  
14  
15  
16  
17

## 18 **Conclusion**

19  
20  
21 This study has demonstrated the feasibility of record-linkage between cohort-based data and  
22 hospital-based EHRs with high data linkage rates in Hong Kong using batches of HKID to  
23 obtain EHRs and exact matching using date of birth and sex as identifiable variables. The  
24 record linkage methodology and linked database generated from this study will enable future  
25  
26  
27  
28  
29  
30  
31  
32  
33  
34  
35  
36  
37  
38  
39  
40  
41  
42  
43  
44  
45  
46  
47  
48  
49  
50  
51  
52  
53  
54  
55  
56  
57  
58  
59  
60  
61  
62  
63  
64  
65  
66  
67  
68  
69  
70  
71  
72  
73  
74  
75  
76  
77  
78  
79  
80  
81  
82  
83  
84  
85  
86  
87  
88  
89  
90  
91  
92  
93  
94  
95  
96  
97  
98  
99  
100

## References

1. March S. Individual Data Linkage of Survey Data with Claims Data in Germany-An Overview Based on a Cohort Study. *Int J Environ Res Public Health* 2017;14(12) doi: 10.3390/ijerph14121543 [published Online First: 2017/12/14]
2. Funkhouser E, Vellala K, Baltuck C, et al. Survey Methods to Optimize Response Rate in the National Dental Practice-Based Research Network. *Eval Health Prof* 2017;40(3):332-58. doi: 10.1177/0163278715625738 [published Online First: 2016/01/13]
3. The use of epidemiological tools in conflict-affected populations: open-access educational resources for policy-makers [Available from: [http://conflict.lshtm.ac.uk/page\\_51.htm](http://conflict.lshtm.ac.uk/page_51.htm) accessed 5 June 2020.
4. Casey JA, Schwartz BS, Stewart WF, et al. Using Electronic Health Records for Population Health Research: A Review of Methods and Applications. *Annu Rev Public Health* 2016;37:61-81. doi: 10.1146/annurev-publhealth-032315-021353 [published Online First: 2015/12/17]
5. Abul-Husn NS, Kenny EE. Personalized Medicine and the Power of Electronic Health Records. *Cell* 2019;177(1):58-69. doi: 10.1016/j.cell.2019.02.039 [published Online First: 2019/03/23]
6. Rivera DR, Gokhale MN, Reynolds MW, et al. Linking electronic health data in pharmacoepidemiology: Appropriateness and feasibility. *Pharmacoepidemiol Drug Saf* 2020;29(1):18-29. doi: 10.1002/pds.4918 [published Online First: 2020/01/18]
7. McHugh L, Andrews RM, Leckning B, et al. Baseline incidence of adverse birth outcomes and infant influenza and pertussis hospitalisations prior to the introduction of influenza and pertussis vaccination in pregnancy: a data linkage study of 78 382 mother-infant pairs, Northern Territory, Australia, 1994-2015. *Epidemiol Infect* 2019;147:e233. doi: 10.1017/S0950268819001171 [published Online First: 2019/08/01]
8. Lohr AM, Ingram M, Carvajal SC, et al. Protocol for LINKS (linking individual needs to community and clinical services): a prospective matched observational study of a community health worker community clinical linkage intervention on the U.S.-Mexico border. *BMC Public Health* 2019;19(1):399. doi: 10.1186/s12889-019-6725-1 [published Online First: 2019/04/13]
9. Griffiths LJ, Cortina-Borja M, Tingay K, et al. Are active children and young people at increased risk of injuries resulting in hospital admission or accident and emergency department attendance? Analysis of linked cohort and electronic hospital records in Wales and Scotland. *PLoS One* 2019;14(4):e0213435. doi: 10.1371/journal.pone.0213435 [published Online First: 2019/04/11]
10. Donovan GH, Michael YL, Gatzliolis D, et al. Association between exposure to the natural environment, rurality, and attention-deficit hyperactivity disorder in children in New Zealand: a linkage study. *Lancet Planet Health* 2019;3(5):e226-e34. doi: 10.1016/S2542-5196(19)30070-1 [published Online First: 2019/05/28]
11. Yu HT, Yang Q, Sun XX, et al. Association of birth defects with the mode of assisted reproductive technology in a Chinese data-linkage cohort. *Fertil Steril* 2018;109(5):849-56. doi: 10.1016/j.fertnstert.2018.01.012 [published Online First: 2018/05/21]
12. Lo CK, Ho FK, Chan KL, et al. Linking Healthcare and Social Service Databases to Study the Epidemiology of Child Maltreatment and Associated Health Problems: Hong Kong's Experience. *J Pediatr* 2018;202:291-99 e1. doi: 10.1016/j.jpeds.2018.06.033 [published Online First: 2018/07/22]
13. He B, Huang JV, Kwok MK, et al. The association of early-life exposure to air pollution with lung function at ~17.5years in the "Children of 1997" Hong Kong Chinese Birth Cohort. *Environ Int* 2019;123:444-50. doi: 10.1016/j.envint.2018.11.073 [published Online First: 2019/01/10]
14. Tso W, Rao N, Jiang F, et al. Sleep Duration and School Readiness of Chinese Preschool Children. *J Pediatr* 2016;169:266-71. doi: 10.1016/j.jpeds.2015.10.064 [published Online First: 2015/11/27]

15. Ip P, Rao N, Bacon-Shone J, et al. Socioeconomic gradients in school readiness of Chinese preschool children: The mediating role of family processes and kindergarten quality. *Early Childhood Research Quarterly* 2016;35:111-23.
16. Liu J, Au Yeung SL, He B, et al. The effect of birth weight on body composition: Evidence from a birth cohort and a Mendelian randomization study. *PLoS One* 2019;14(9):e0222141. doi: 10.1371/journal.pone.0222141 [published Online First: 2019/09/11]
17. Man KKC, Chan EW, Ip P, et al. Prenatal antidepressant use and risk of attention-deficit/hyperactivity disorder in offspring: population based cohort study. *Bmj* 2017;357:j2350. doi: 10.1136/bmj.j2350 [published Online First: 2017/06/02]
18. Man KKC, Coghill D, Chan EW, et al. Association of Risk of Suicide Attempts With Methylphenidate Treatment. *JAMA psychiatry* 2017;74(10):1048-55. doi: 10.1001/jamapsychiatry.2017.2183 [published Online First: 2017/07/27]
19. Man KKC, Lau WCY, Coghill D, et al. Association between methylphenidate treatment and risk of seizure: a population-based, self-controlled case-series study. *Lancet Child Adolesc Health* 2020;4(6):435-43. doi: 10.1016/S2352-4642(20)30100-0 [published Online First: 2020/05/26]
20. Raman SR, Man KKC, Bahmanyar S, et al. Trends in attention-deficit hyperactivity disorder medication use: a retrospective observational study using population-based databases. *Lancet Psychiatry* 2018;5(10):824-35. doi: 10.1016/S2215-0366(18)30293-1 [published Online First: 2018/09/18]
21. Lai KY, Leung PW, Luk ES, et al. Validation of the Chinese strengths and weaknesses of ADHD-symptoms and normal-behaviors questionnaire in Hong Kong. *J Atten Disord* 2013;17(3):194-202. doi: 10.1177/1087054711430711 [published Online First: 2012/01/03]
22. Adams HHH, Roshchupkin GV, DeCarli C, et al. Full exploitation of high dimensionality in brain imaging: The JPND working group statement and findings. *Alzheimers Dement (Amst)* 2019;11:286-90. doi: 10.1016/j.dadm.2019.02.003 [published Online First: 2019/04/13]
23. ABOUT JPND [Available from: <https://www.neurodegenerationresearch.eu/about/> accessed 28 July 2020.
24. Collaboration CGC. Inequality in outcomes for adolescents living with perinatally acquired HIV in sub-Saharan Africa: a Collaborative Initiative for Paediatric HIV Education and Research (CIPHER) Cohort Collaboration analysis. *J Int AIDS Soc* 2018;21 Suppl 1 doi: 10.1002/jia2.25044 [published Online First: 2018/02/28]
25. Collaborative Initiative for Paediatric HIV Education and Research (CIPHER) [Available from: <https://www.iasociety.org/CIPHER> accessed 28 July 2020.
26. Biosocial Birth Cohort Research Network BBCR [Available from: <https://www.ucl.ac.uk/anthropology/research/biosocial-birth-cohort-research-network-bbcr> accessed 28 July 2020.
27. Ilomaki J, Bell JS, Chan AYL, et al. Application of Healthcare 'Big Data' in CNS Drug Research: The Example of the Neurological and mental health Global Epidemiology Network (NeuroGEN). *CNS Drugs* 2020 doi: 10.1007/s40263-020-00742-4 [published Online First: 2020/06/24]
28. NEUROLOGICAL AND MENTAL HEALTH GLOBAL EPIDEMIOLOGY NETWORK [Available from: <https://www.neurogen.hku.hk/> accessed 28 July 2020.
29. As PENc, Andersen M, Bergman U, et al. The Asian Pharmacoepidemiology Network (AsPEN): promoting multi-national collaboration for pharmacoepidemiologic research in Asia. *Pharmacoepidemiol Drug Saf* 2013;22(7):700-4. doi: 10.1002/pds.3439 [published Online First: 2013/05/09]
30. Asian Pharmacoepidemiology Network [Available from: <https://www.aspensig.asia/> accessed 29 July 2020.
31. Harron K, Doidge JC, Goldstein H. Assessing data linkage quality in cohort studies. *Ann Hum Biol* 2020;47(2):218-26. doi: 10.1080/03014460.2020.1742379 [published Online First: 2020/05/21]

- 1  
2  
3 32. About UK Biobank [Available from: <https://www.ukbiobank.ac.uk/about-biobank-uk/> accessed 9  
4 September 2020.  
5  
6 33. Peacock A, Chiu V, Leung J, et al. Protocol for the Data-Linkage Alcohol Cohort Study (DACs):  
7 investigating mortality, morbidity and offending among people with an alcohol-related  
8 problem using linked administrative data. *BMJ Open* 2019;9(8):e030605. doi:  
9 10.1136/bmjopen-2019-030605 [published Online First: 2019/08/07]  
10  
11 34. UK Biobank Study Protocol [Available from:  
12 <https://www.ukbiobank.ac.uk/media/gnkeyh2q/study-rationale.pdf> accessed 15 March  
13 2021.  
14  
15 35. Hockley C, Quigley MA, Hughes G, et al. Linking Millennium Cohort data to birth registration and  
16 hospital episode records. *Paediatr Perinat Epidemiol* 2008;22(1):99-109. doi:  
17 10.1111/j.1365-3016.2007.00902.x [published Online First: 2008/01/05]  
18  
19 36. Geltman PL, Fried LE, Arsenault LN, et al. A planned care approach and patient registry to  
20 improve adherence to clinical guidelines for the diagnosis and management of attention-  
21 deficit/hyperactivity disorder. *Acad Pediatr* 2015;15(3):289-96. doi:  
22 10.1016/j.acap.2014.12.002 [published Online First: 2015/04/25]  
23  
24  
25  
26  
27  
28  
29  
30  
31  
32  
33  
34  
35  
36  
37  
38  
39  
40  
41  
42  
43  
44  
45  
46  
47  
48  
49  
50  
51  
52  
53  
54  
55  
56  
57  
58  
59  
60

1  
2  
3 **Figure legends**  
4  
5

6 **Figure 1** Method to generate batches. Abbreviation: dob, date of birth; M, male; F, female.  
7

8  
9 **Figure 2** Method to link data from cohort and CDARS in each batch. Abbreviation: dob, date  
10 of birth; EHRs, electronic health records; CDARS, Hong Kong Clinical Data Analysis and  
11 Reporting System.  
12  
13  
14

15  
16 **Figure 3** Method to calculate the rate of each step.  
17  
18  
19  
20  
21  
22  
23  
24  
25  
26  
27  
28  
29  
30  
31  
32  
33  
34  
35  
36  
37  
38  
39  
40  
41  
42  
43  
44  
45  
46  
47  
48  
49  
50  
51  
52  
53  
54  
55  
56  
57  
58  
59  
60



1  
2  
3  
4  
5  
6  
7  
8  
9  
10  
11  
12  
13  
14  
15  
16  
17  
18  
19  
20  
21  
22  
23  
24  
25  
26  
27  
28  
29  
30  
31  
32  
33  
34  
35  
36  
37  
38  
39  
40  
41  
42  
43  
44  
45  
46  
47  
48  
49  
50  
51  
52  
53  
54  
55  
56  
57  
58  
59  
60

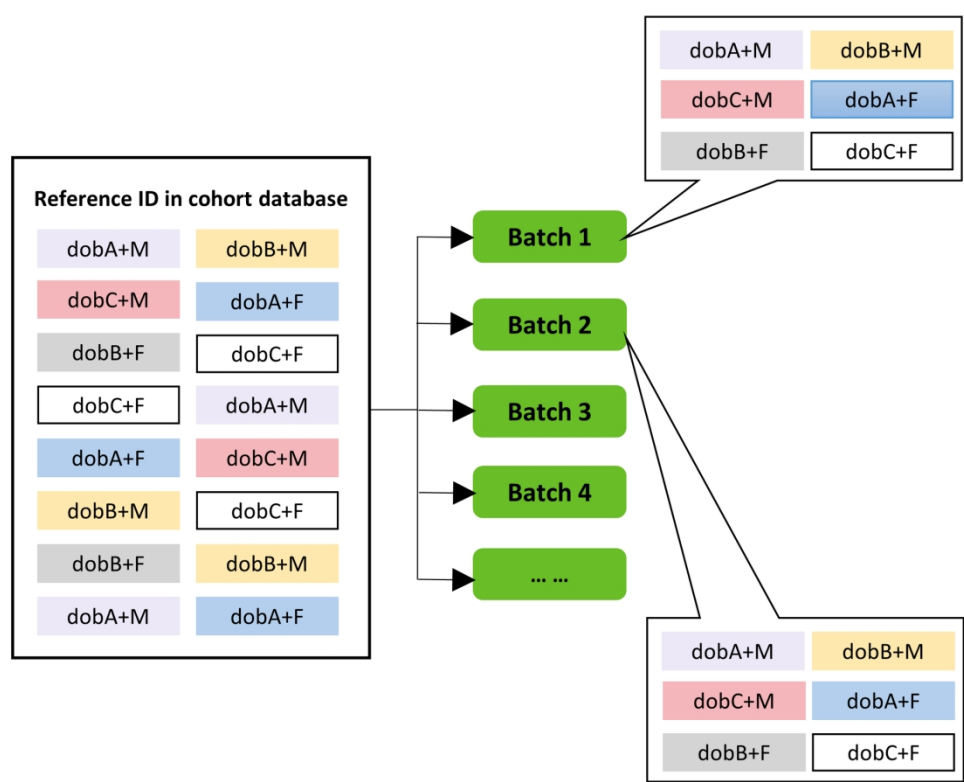

Figure 1 Method to generate batches.  
Abbreviation: dob, date of birth; M, male; F, female.

89x89mm (600 x 600 DPI)

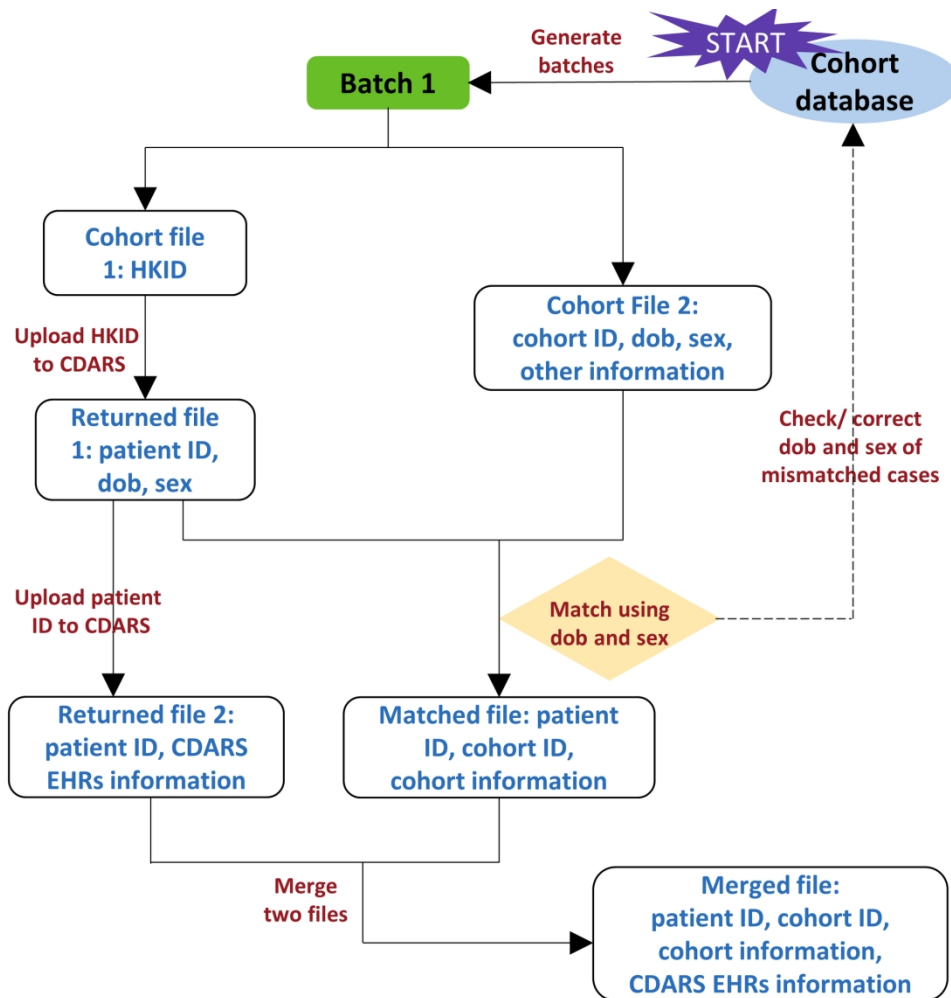

Figure 2 Method to link data from cohort and CDARS in each batch.  
 Abbreviation: dob, date of birth; EHRs, electronic health records; CDARS, Hong Kong Clinical Data Analysis and Reporting System.

89x89mm (600 x 600 DPI)

**Equations:**

$$1) \text{ Valid Hong Kong Identity ID rate} = \frac{\text{No. of valid HKID}}{\text{No. of submitted HKID}} \times 100\%;$$

$$2) \text{ Retrieved rate} = \frac{\text{No. of retrieved records}}{\text{No. of valid HKID}} \times 100\%;$$

$$3) \text{ Crude match rate} = \frac{\text{No. of crude match records}}{\text{No. of retrieved records}} \times 100\%;$$

$$4) \text{ Match rate after checking} = \frac{\text{No. of matched records after checking}}{\text{No. of retrieved records}} \times 100\%;$$

$$5) \text{ Total link rate} = \frac{\text{No. of matched records after checking}}{\text{No. of submitted Hong Kong Identity ID}} \times 100\%.$$

Figure 3 Method to calculate the rate of each step.

83x48mm (600 x 600 DPI)
